# Supplementary material for: Integration of targeted metabolomics and transcriptomics identifies deregulation of phosphatidylcholine metabolism in Huntington’s disease peripheral blood samples
Source: Springer Nature journal article supplement (doi:10.1007/s11306-016-1084-8), 2016-07-27

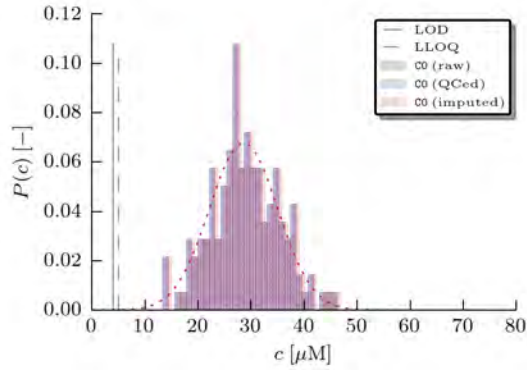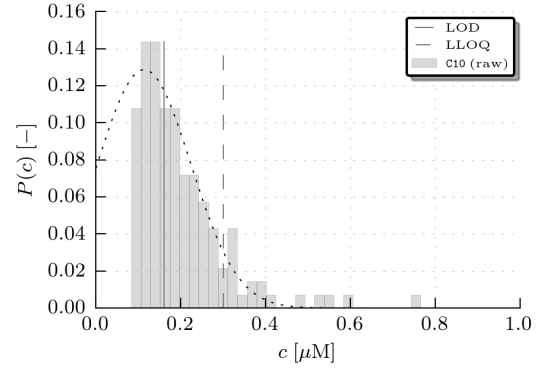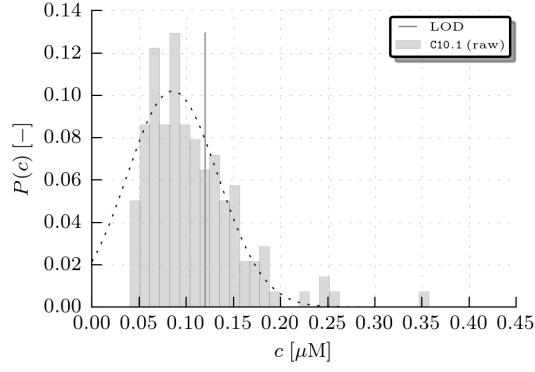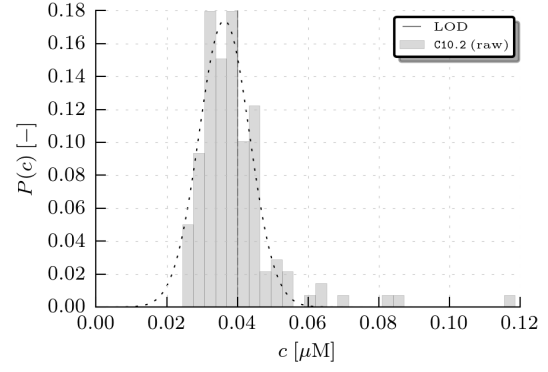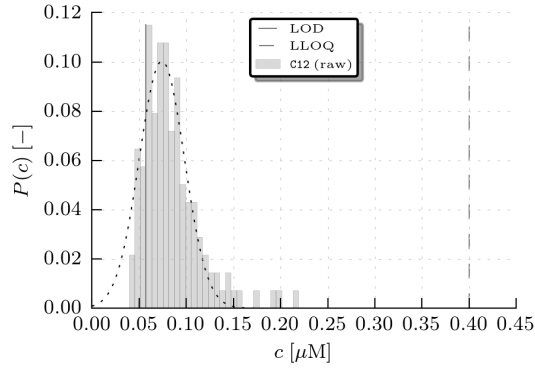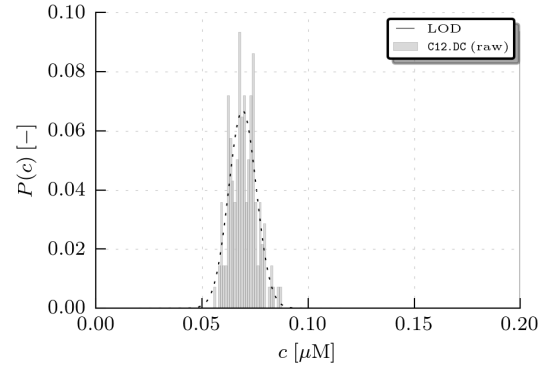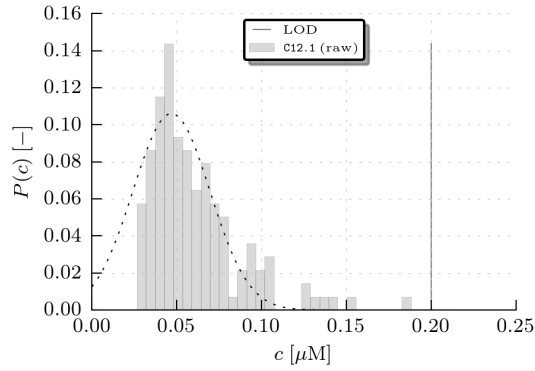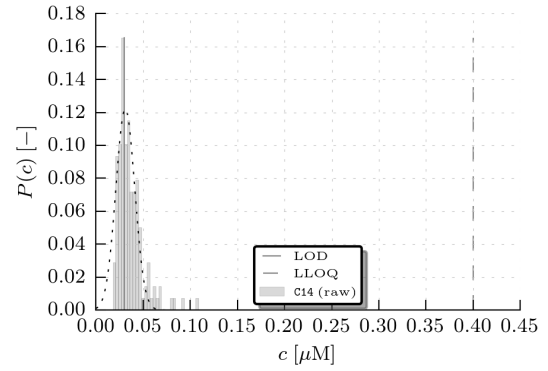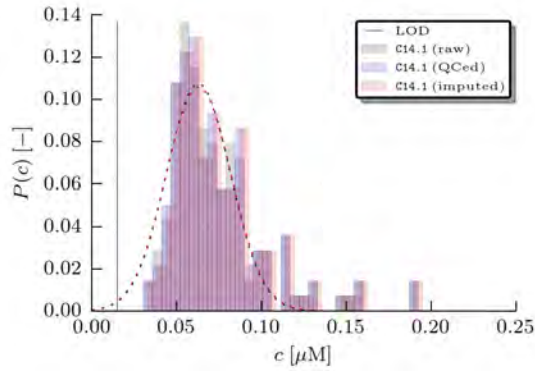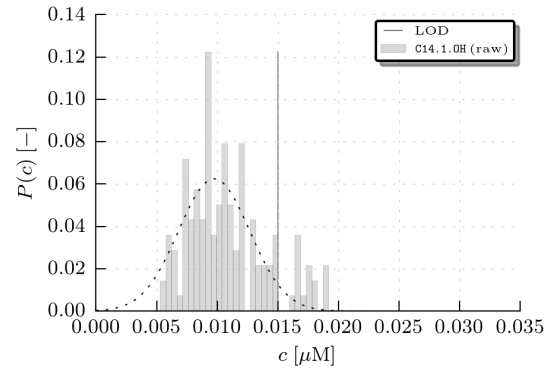

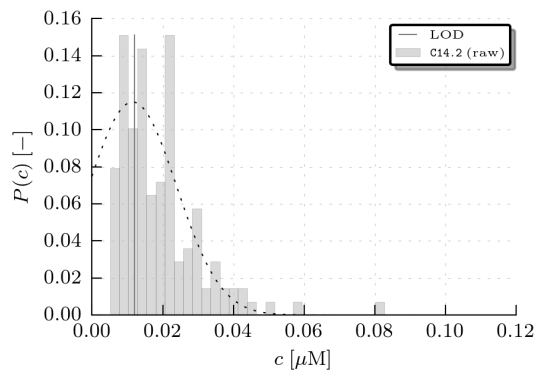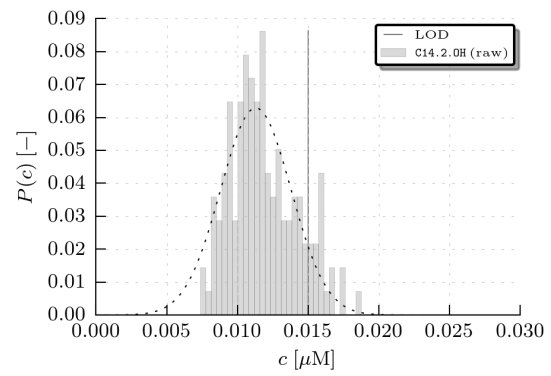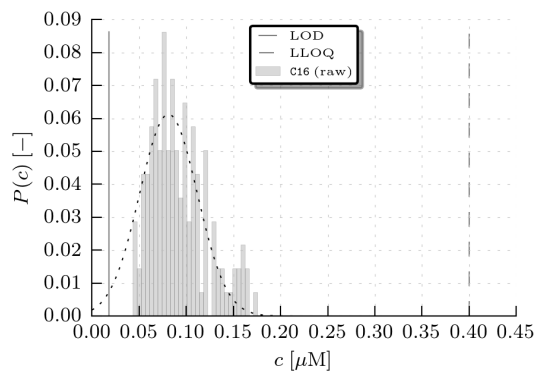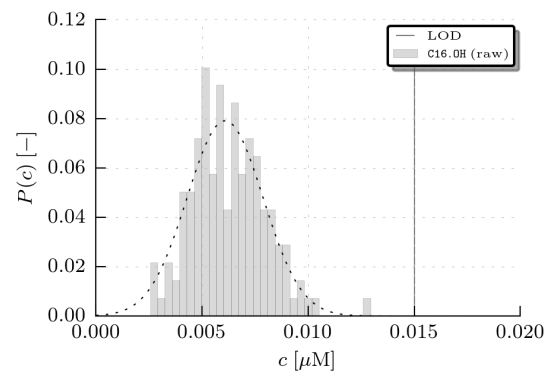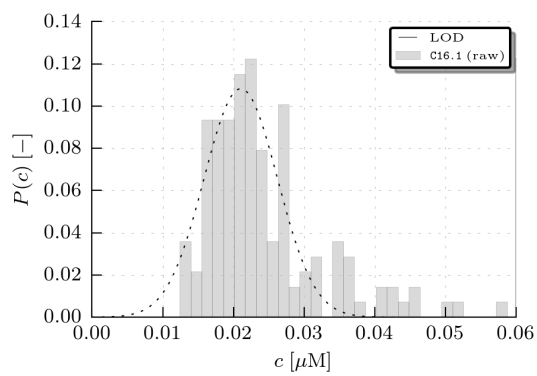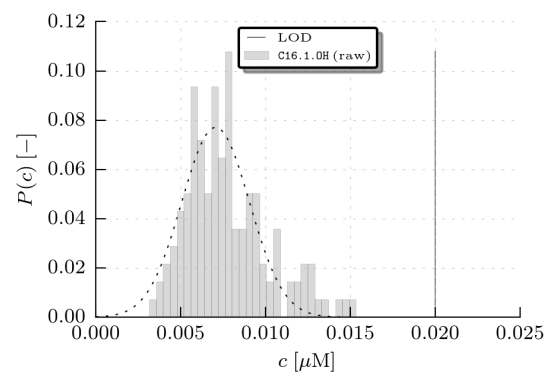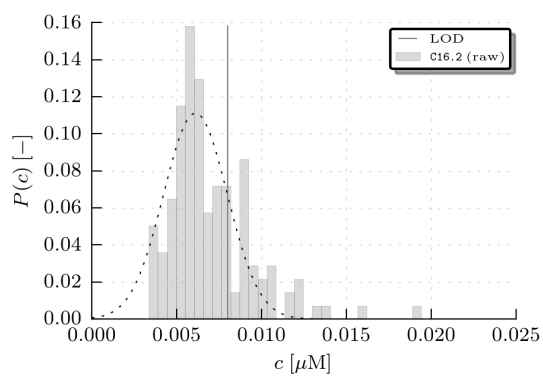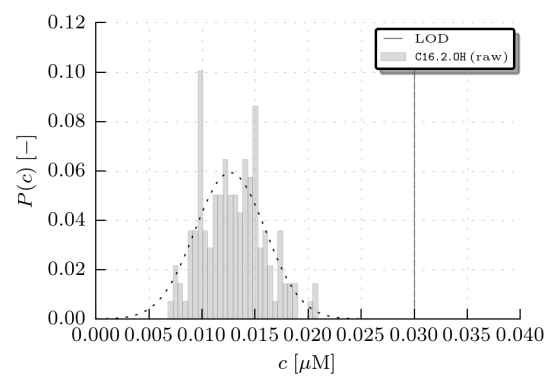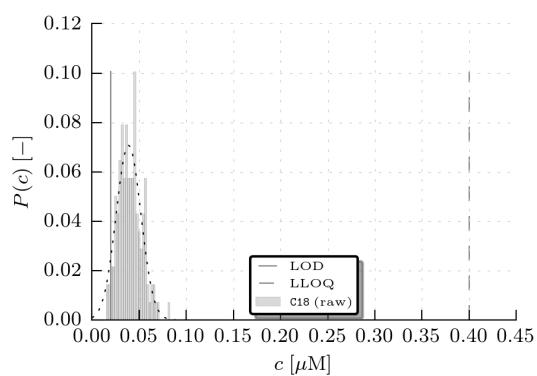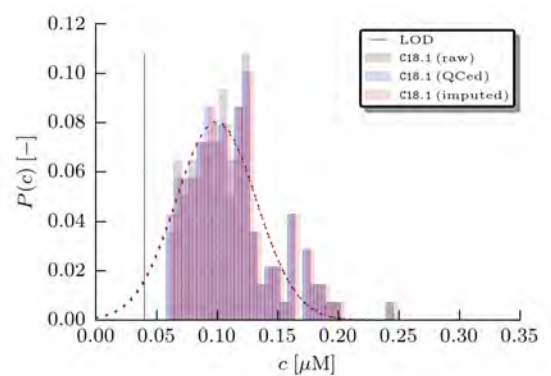

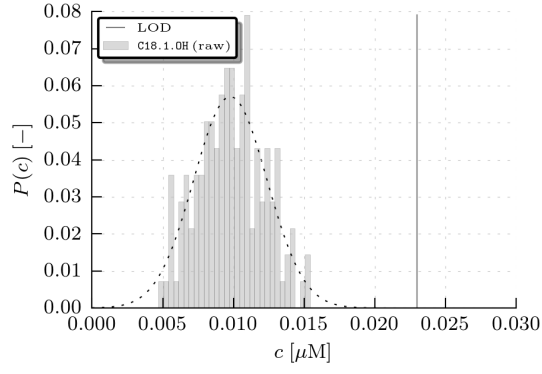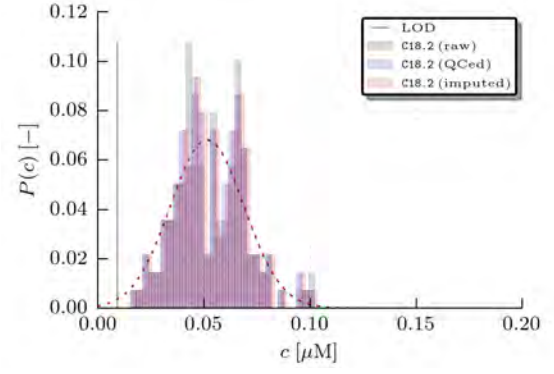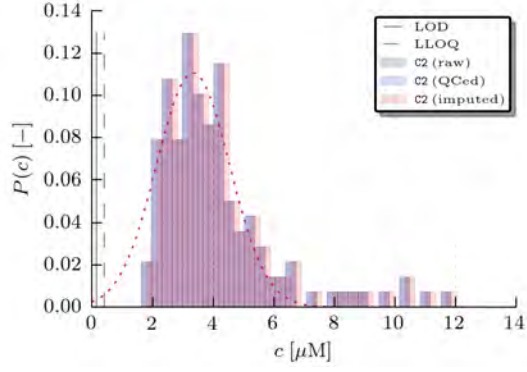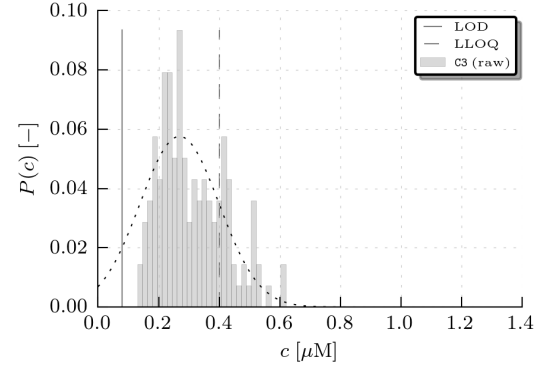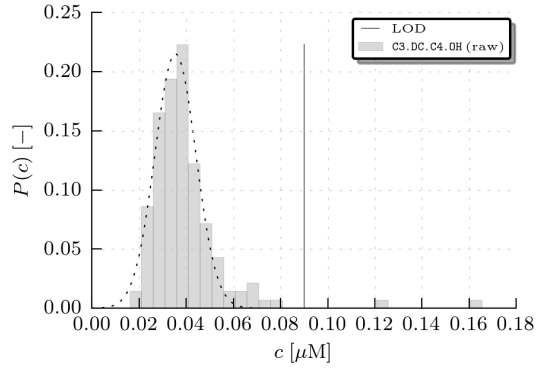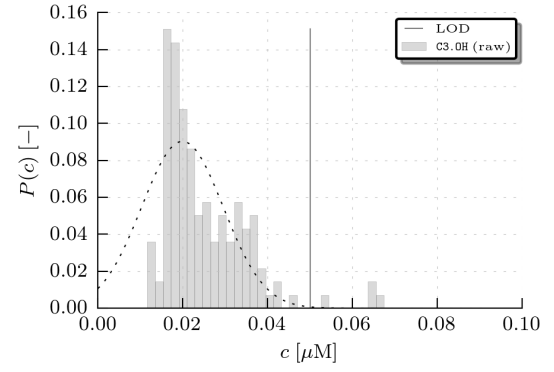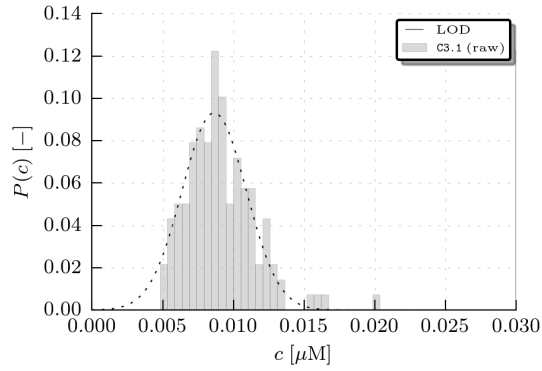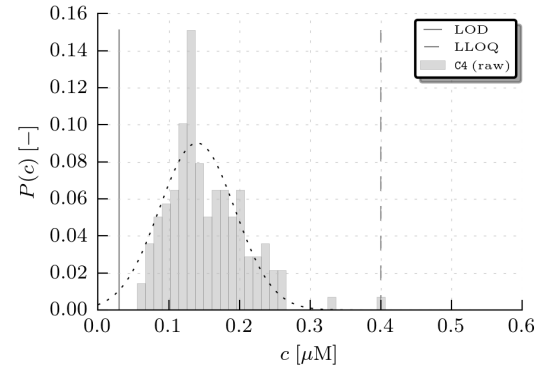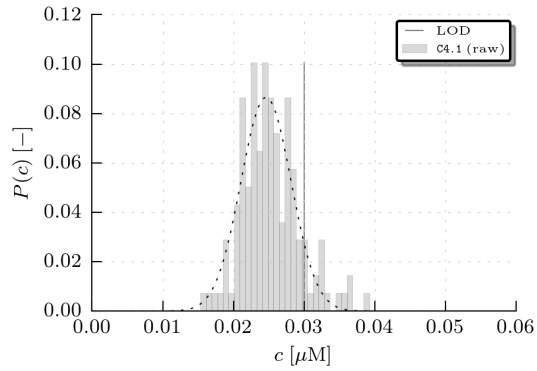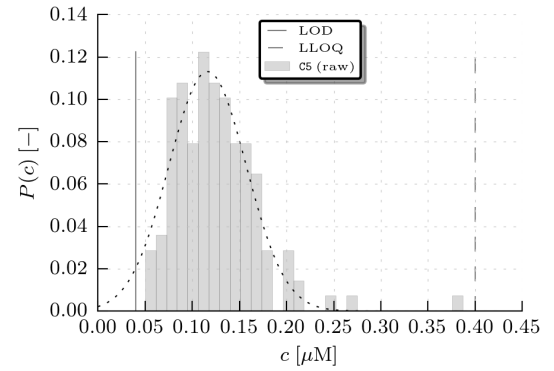

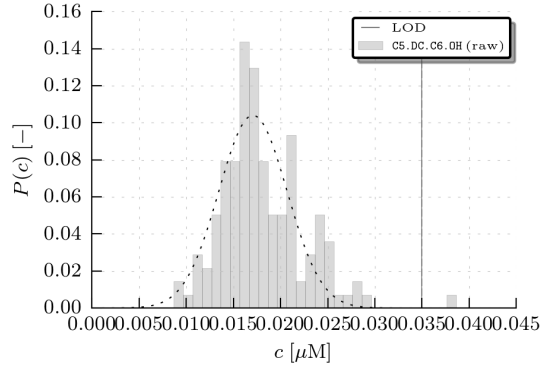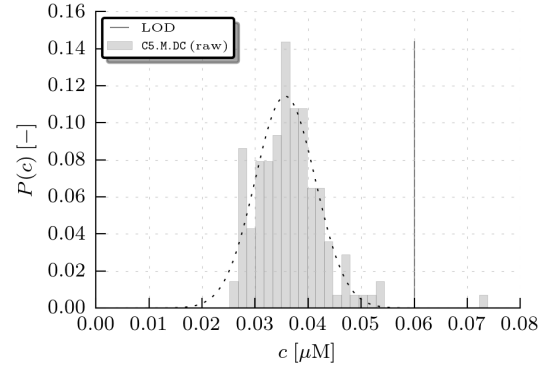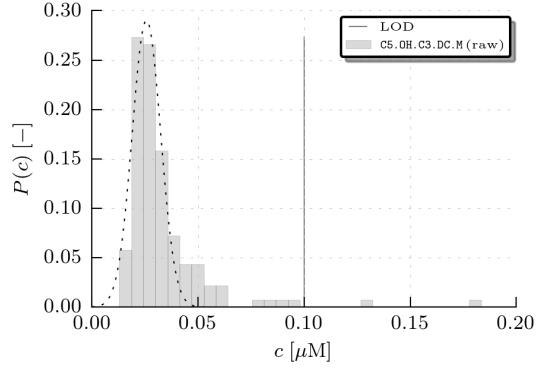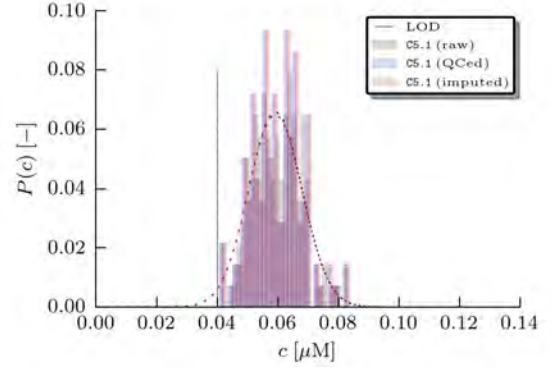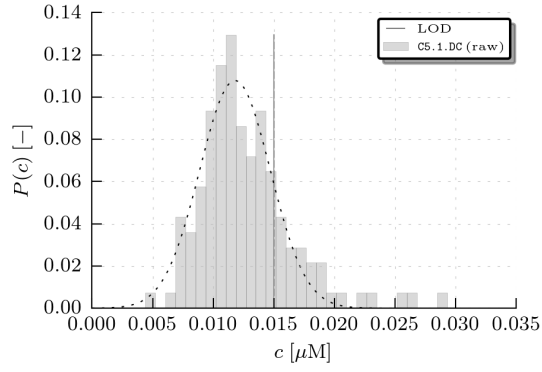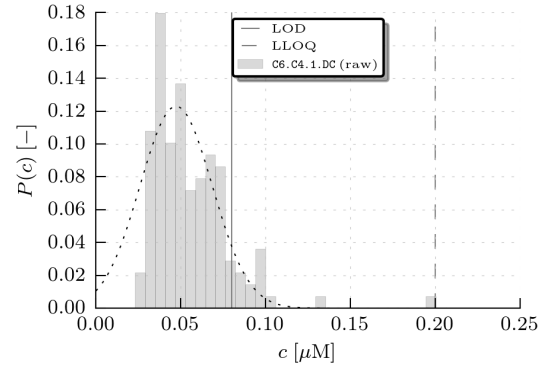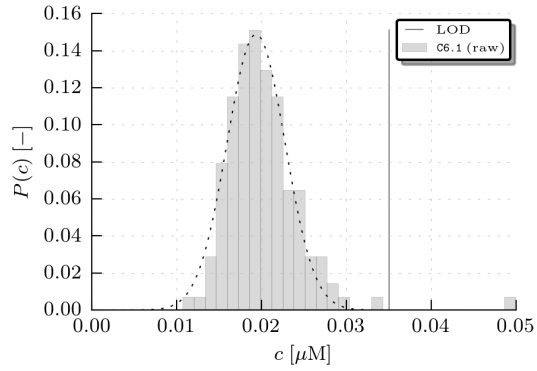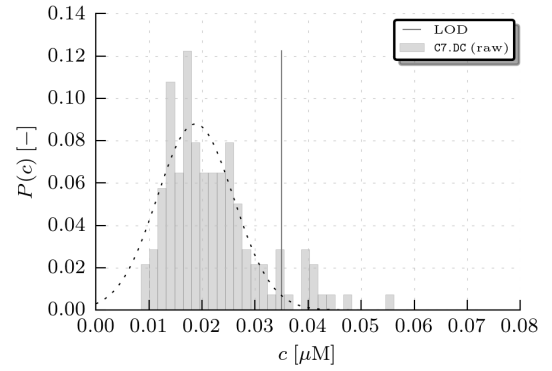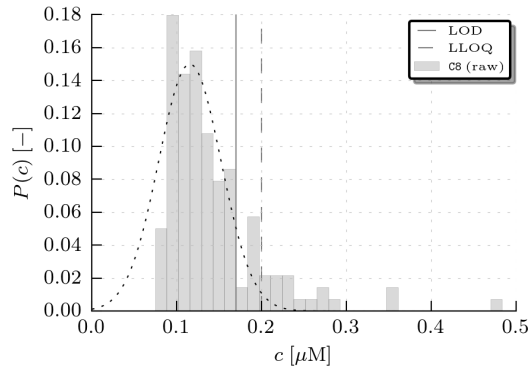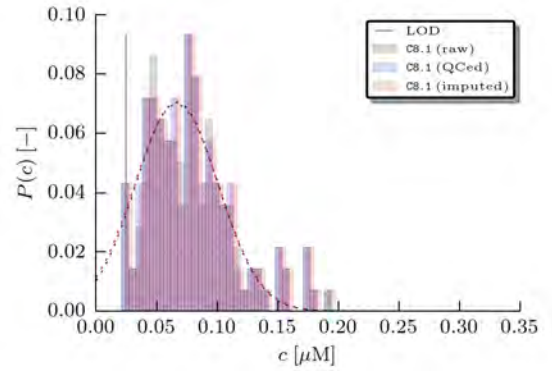

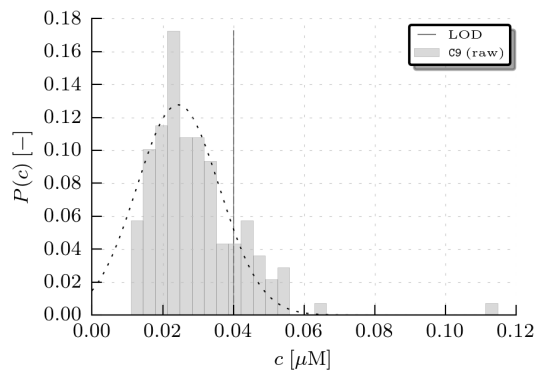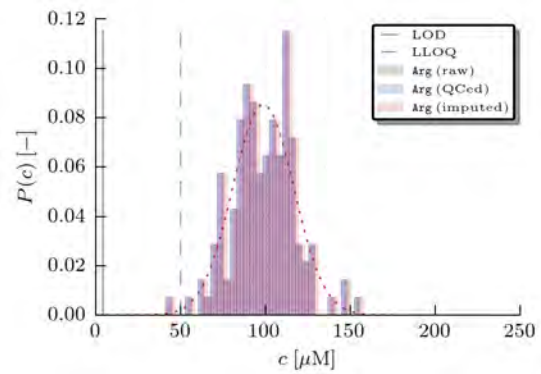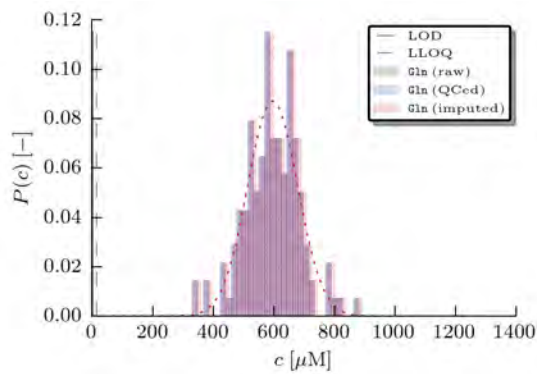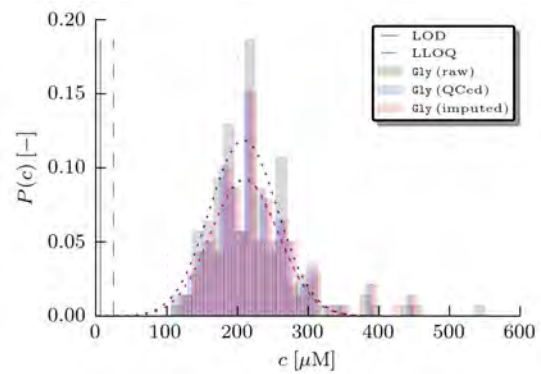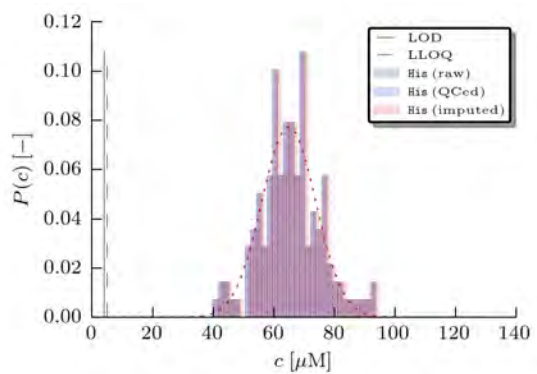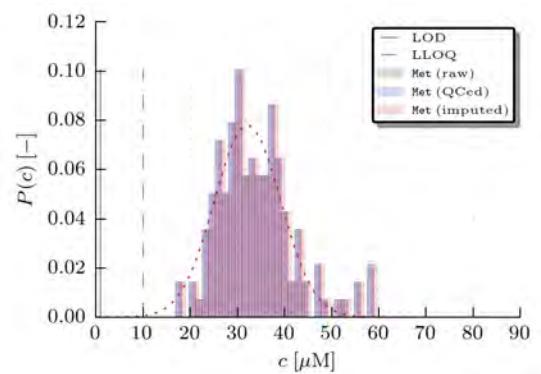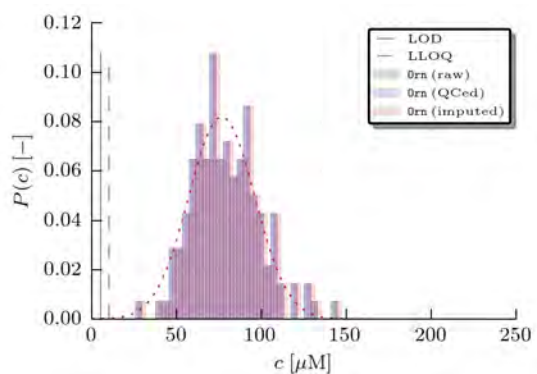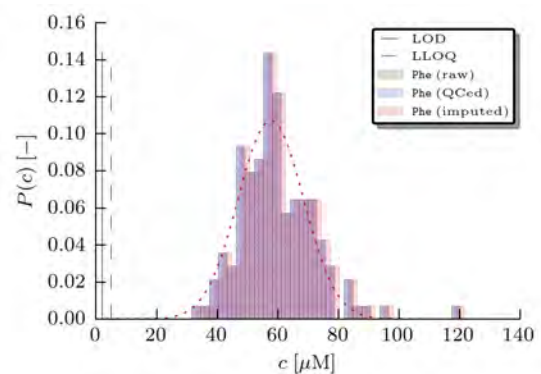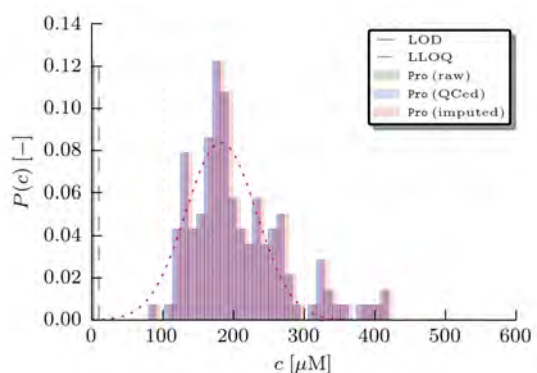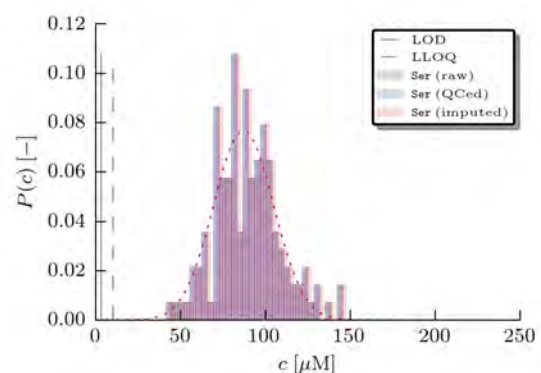



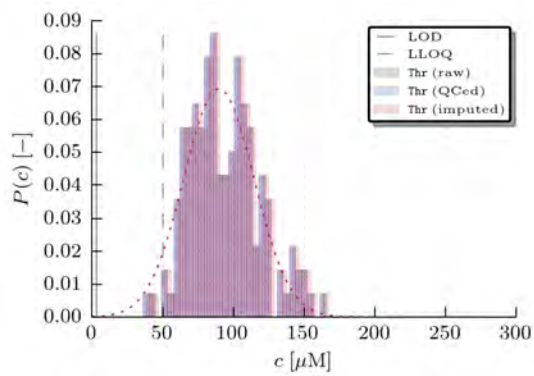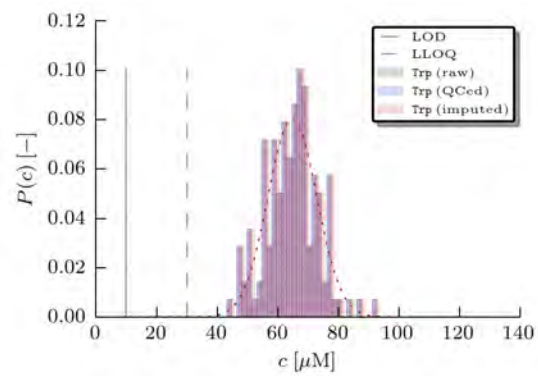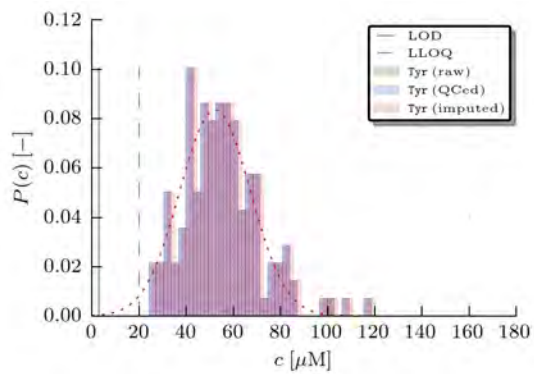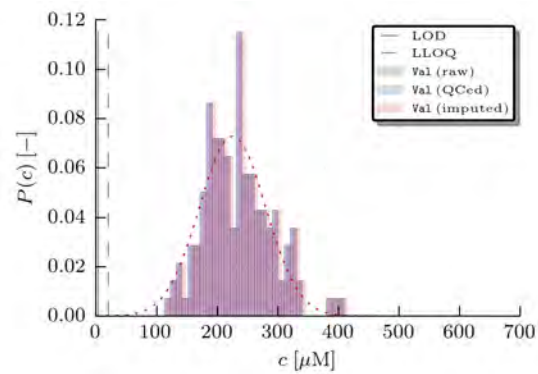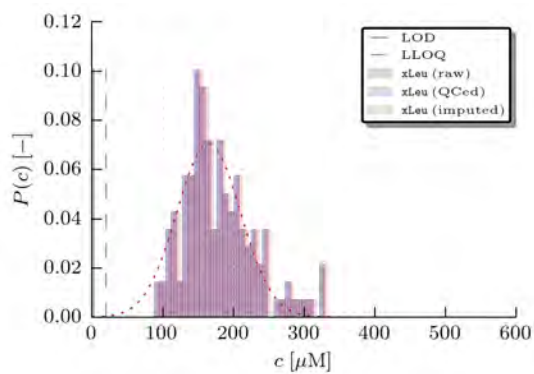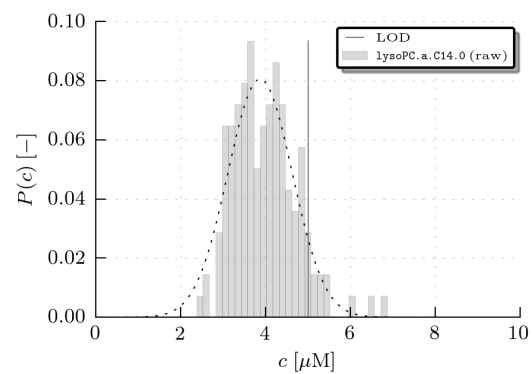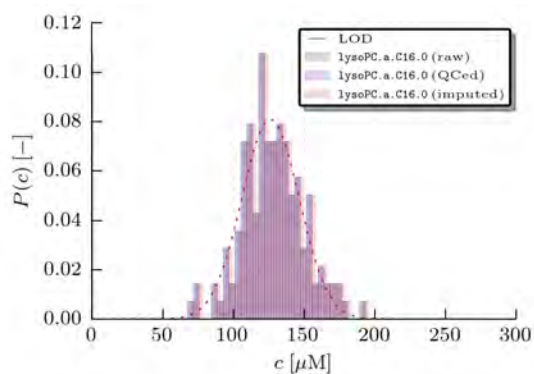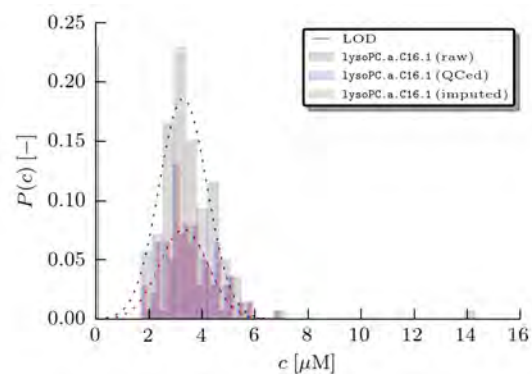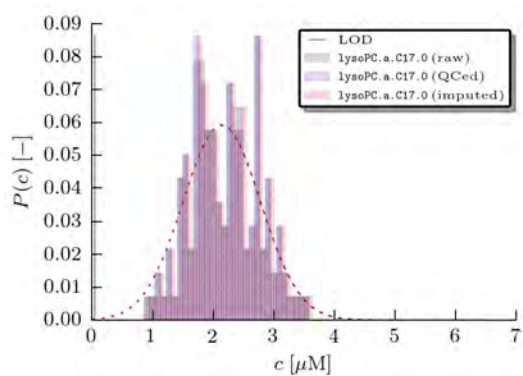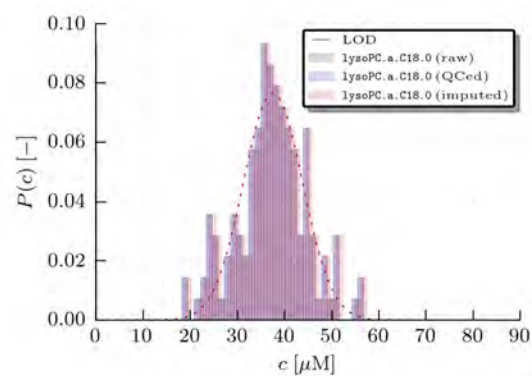

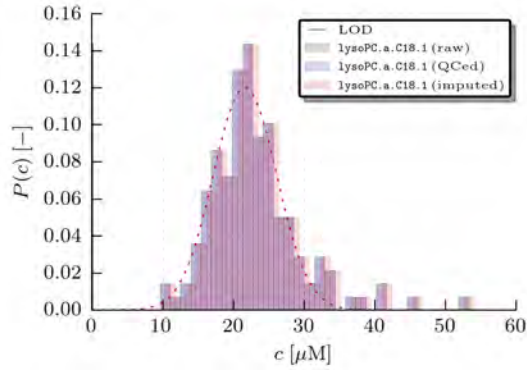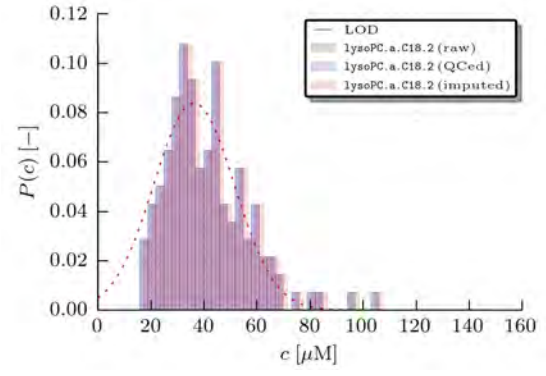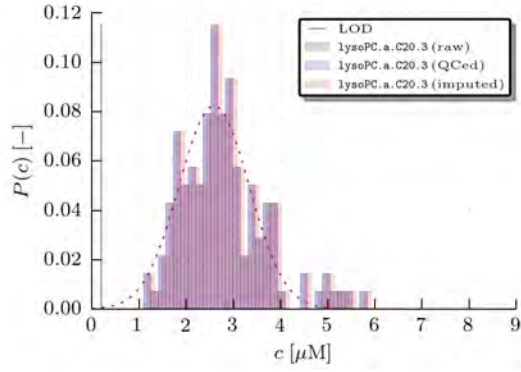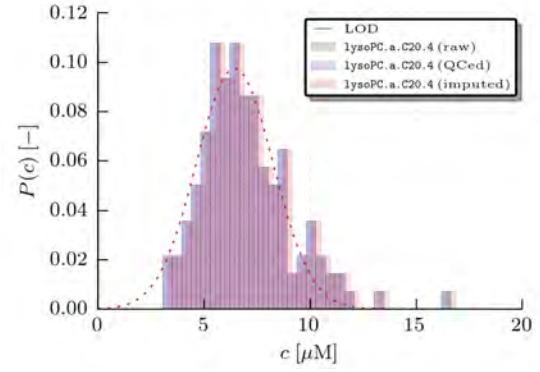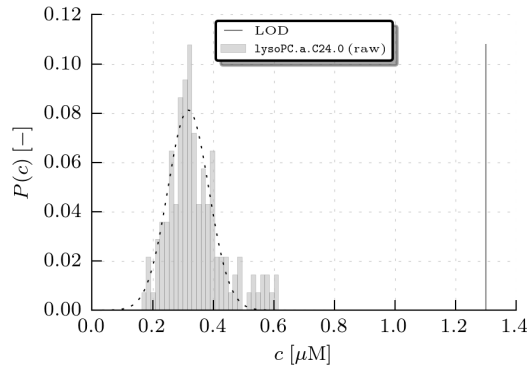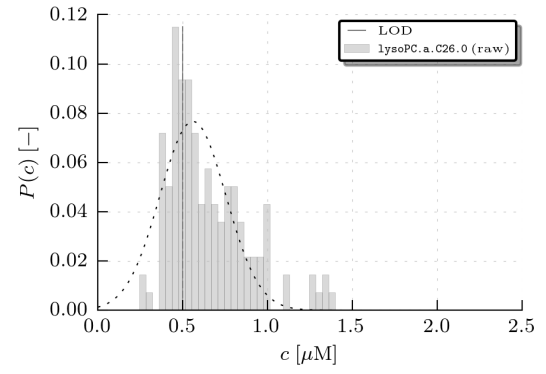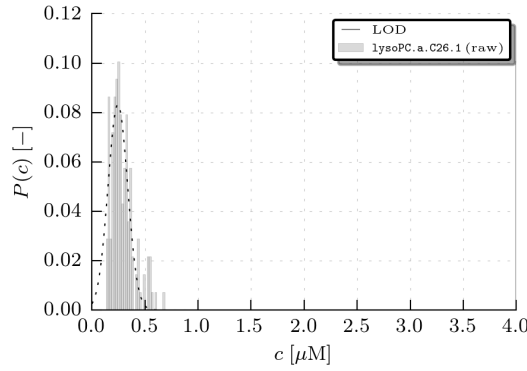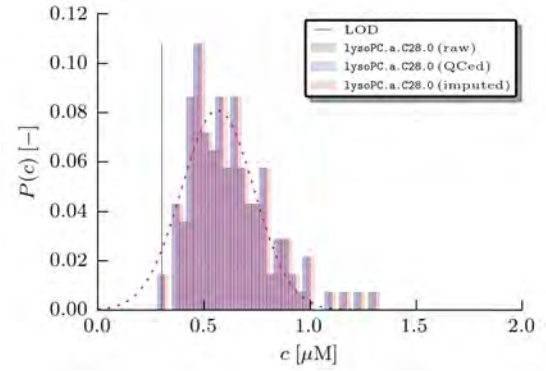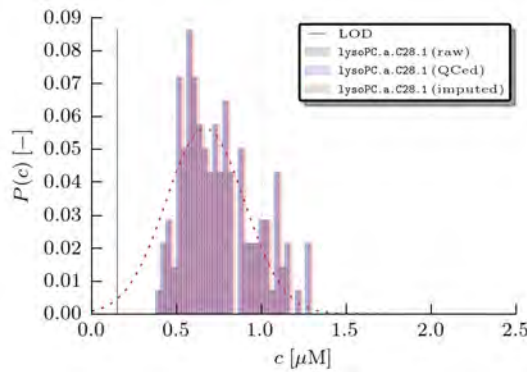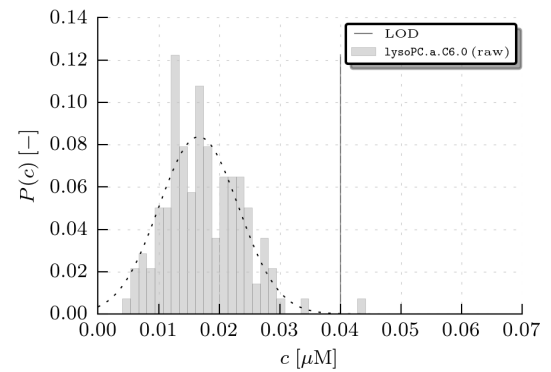

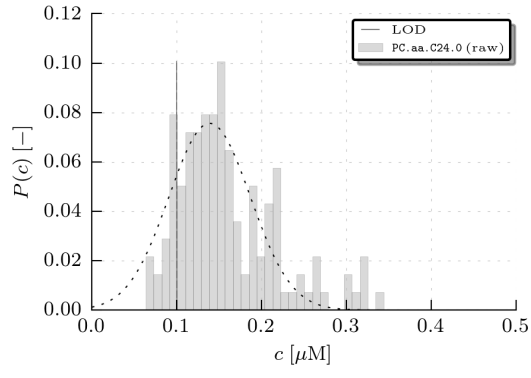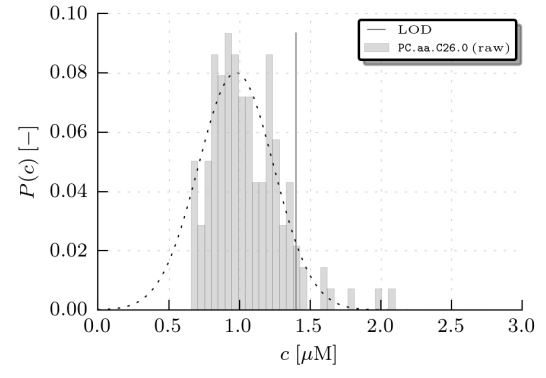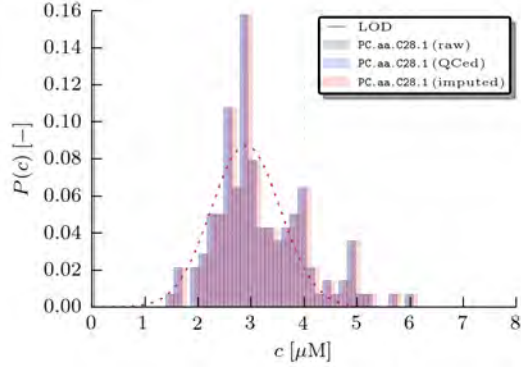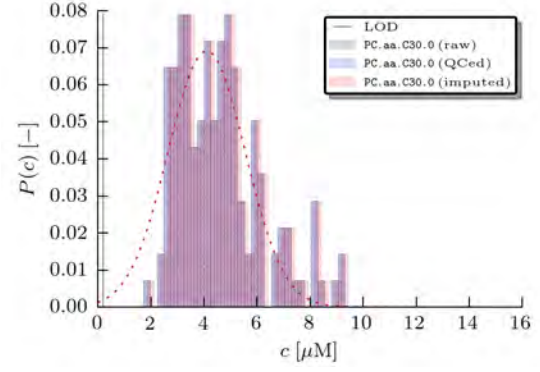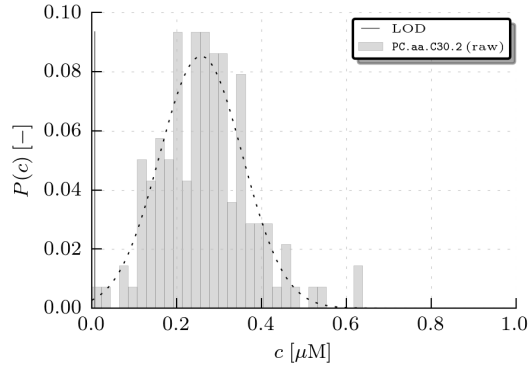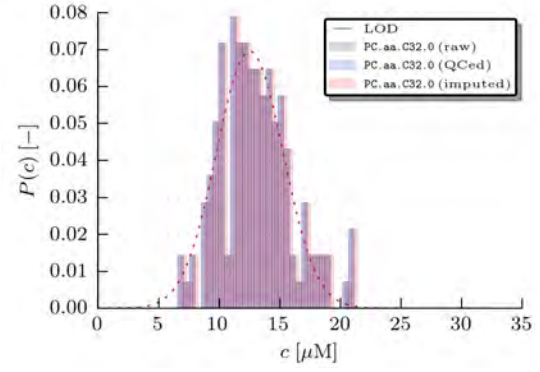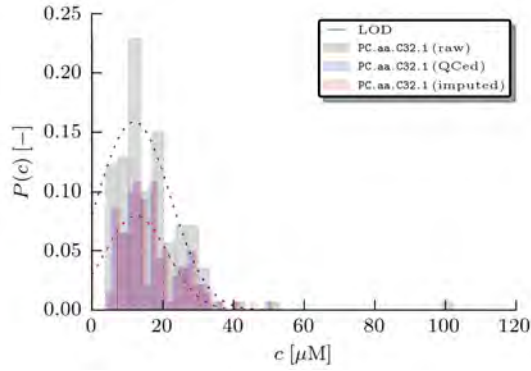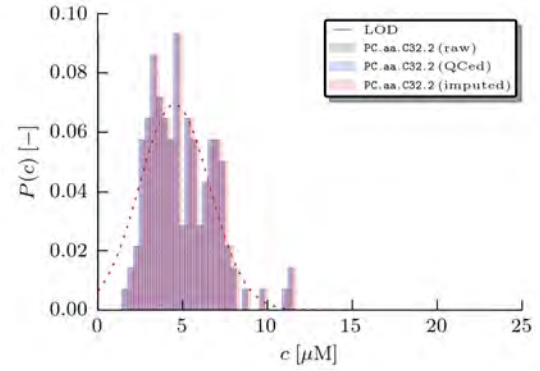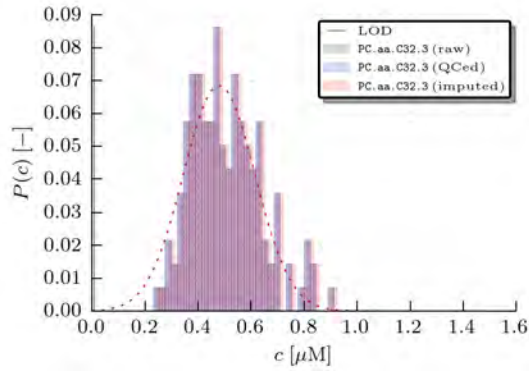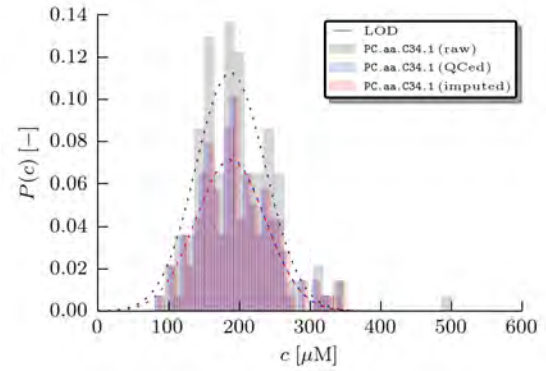



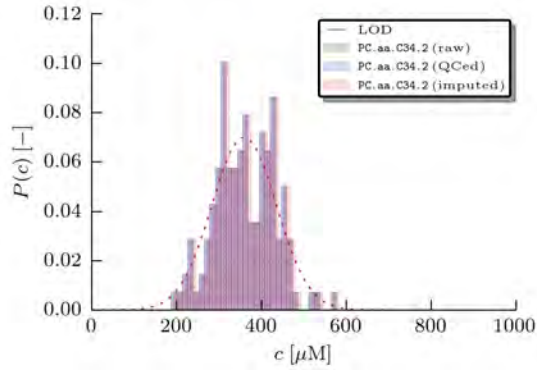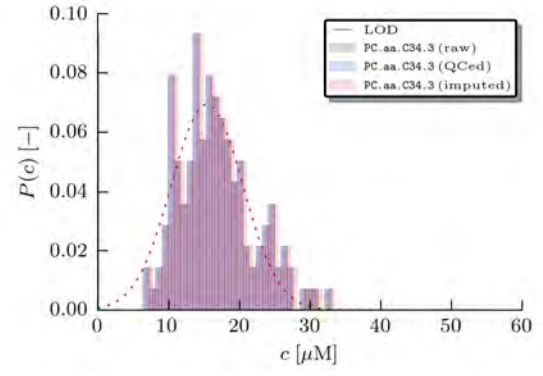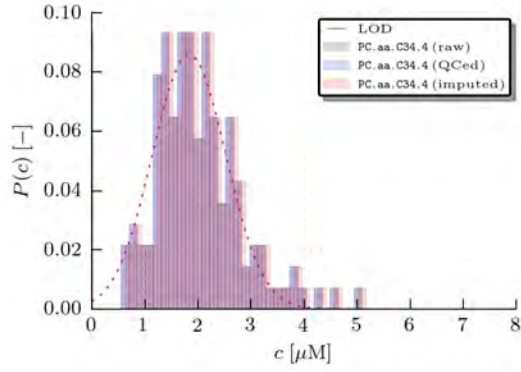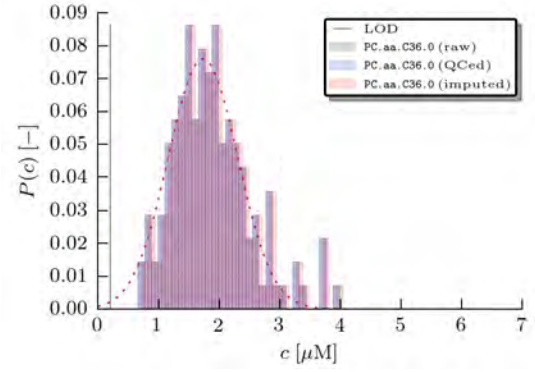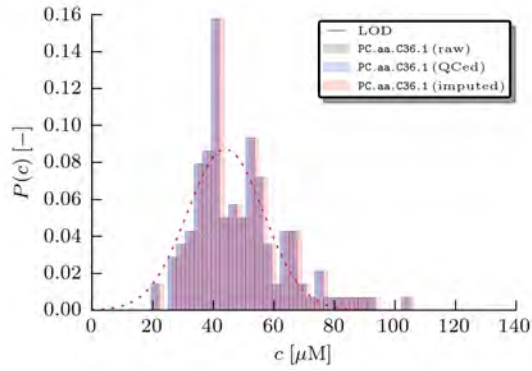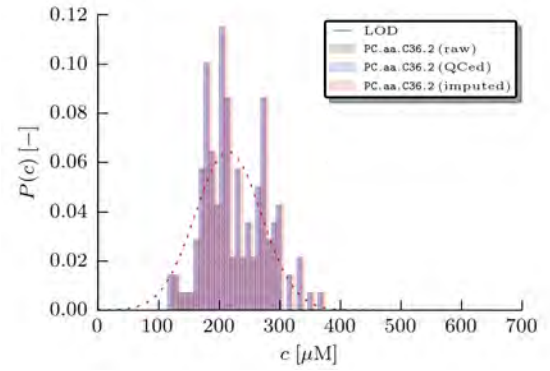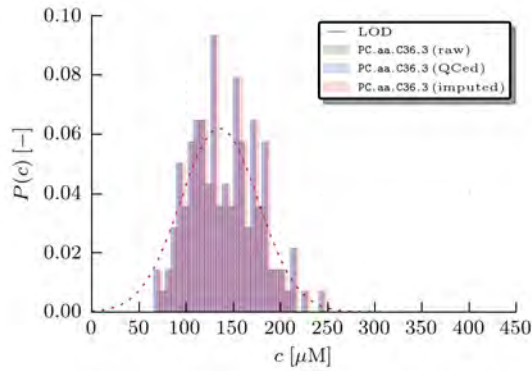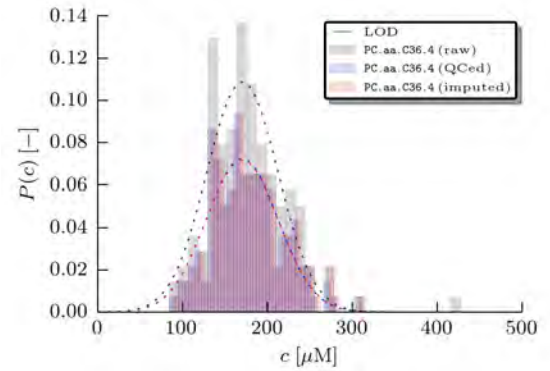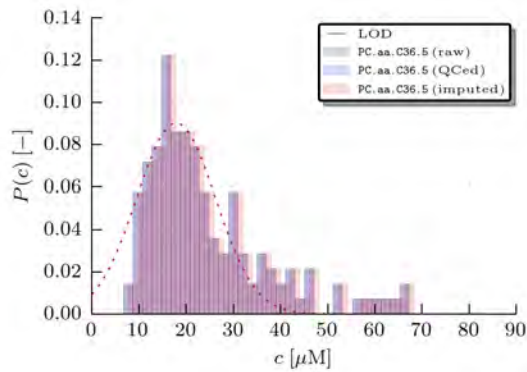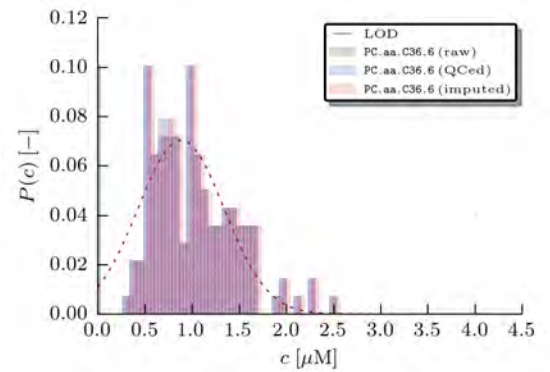

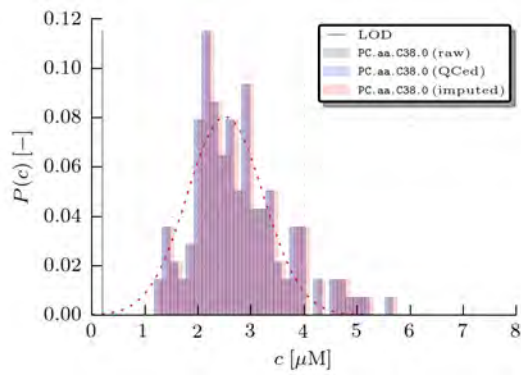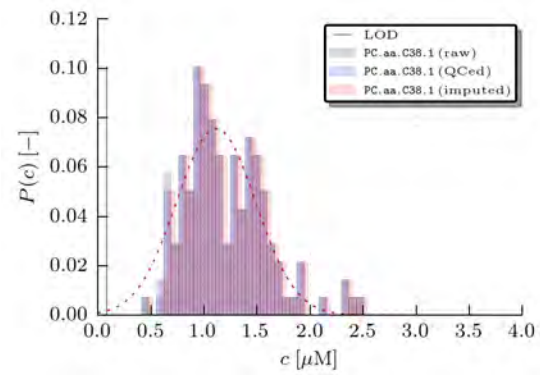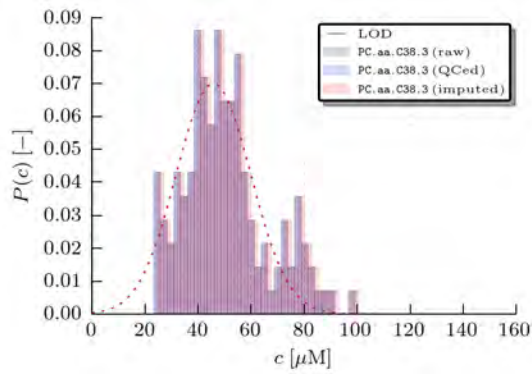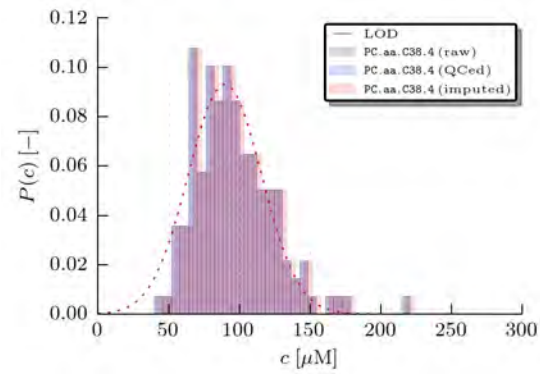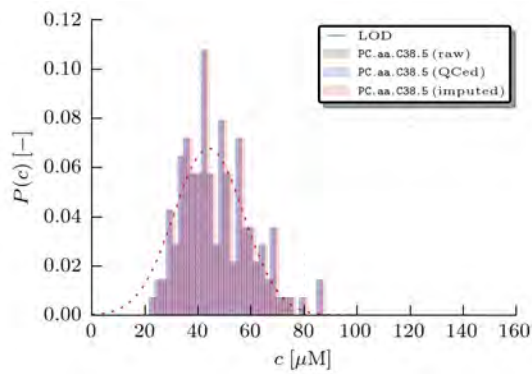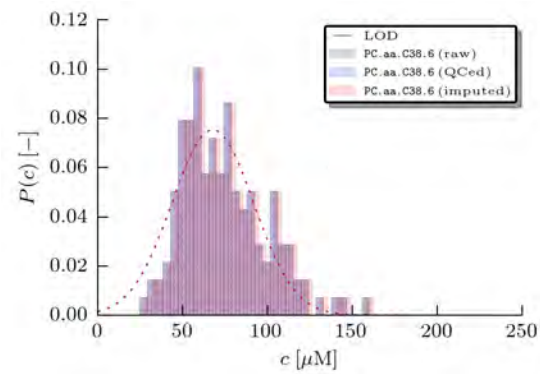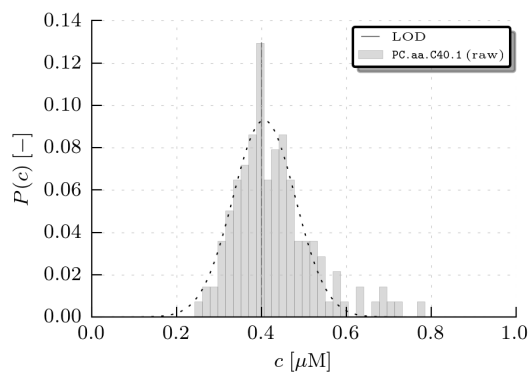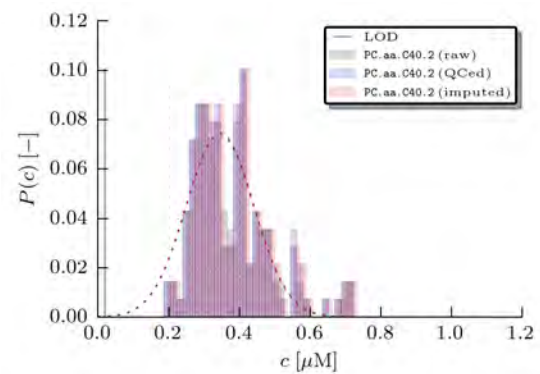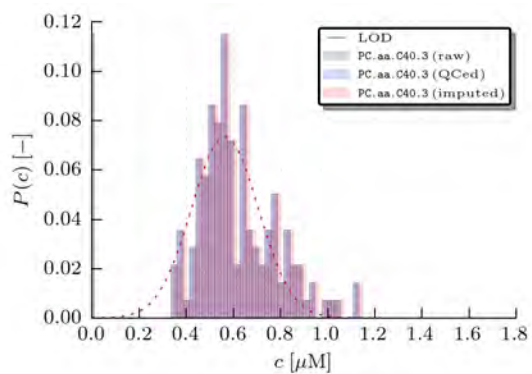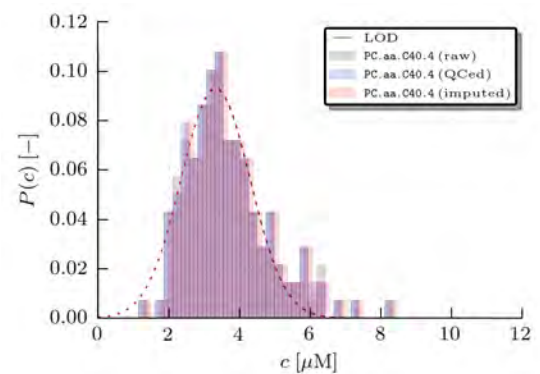

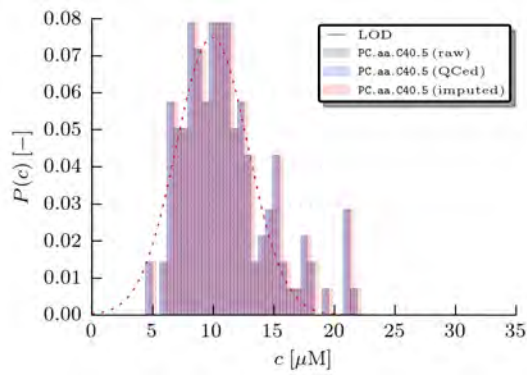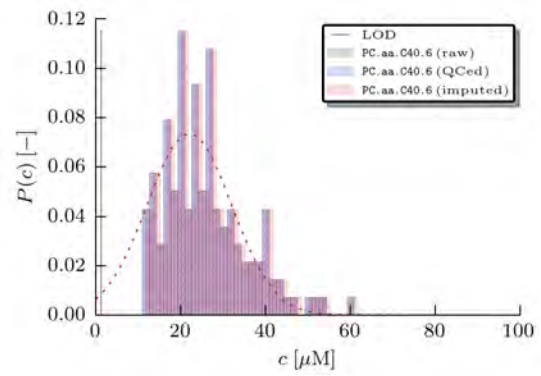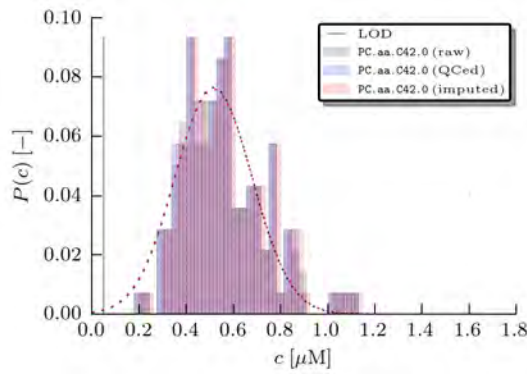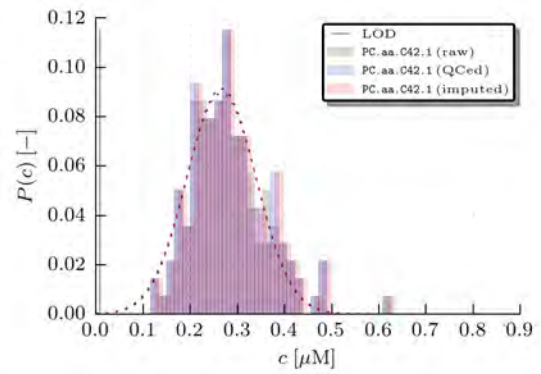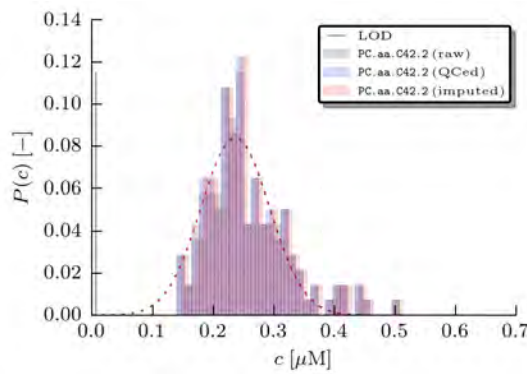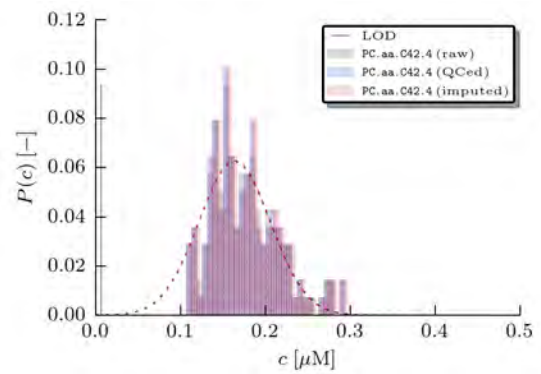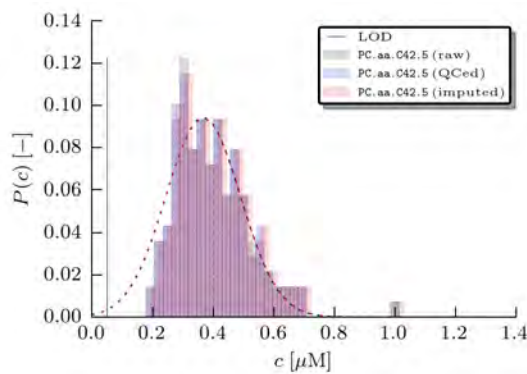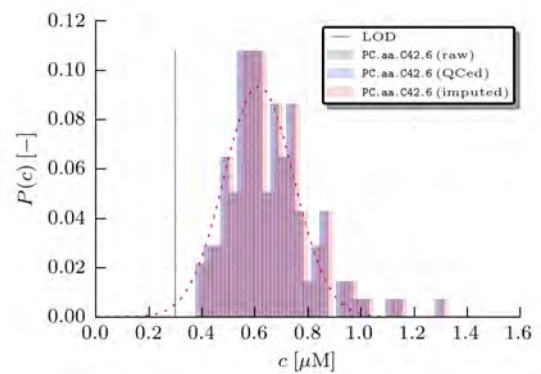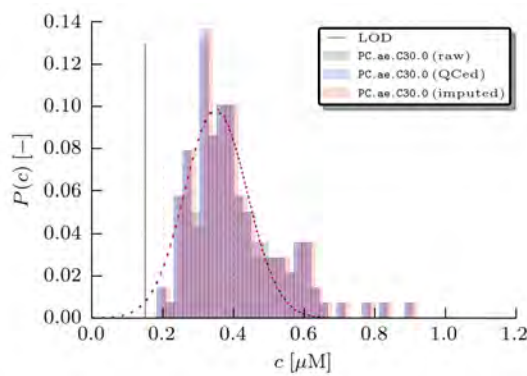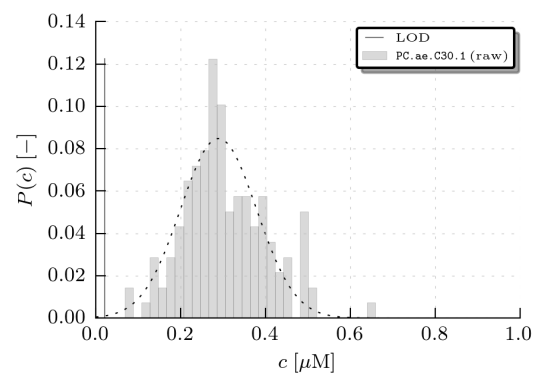



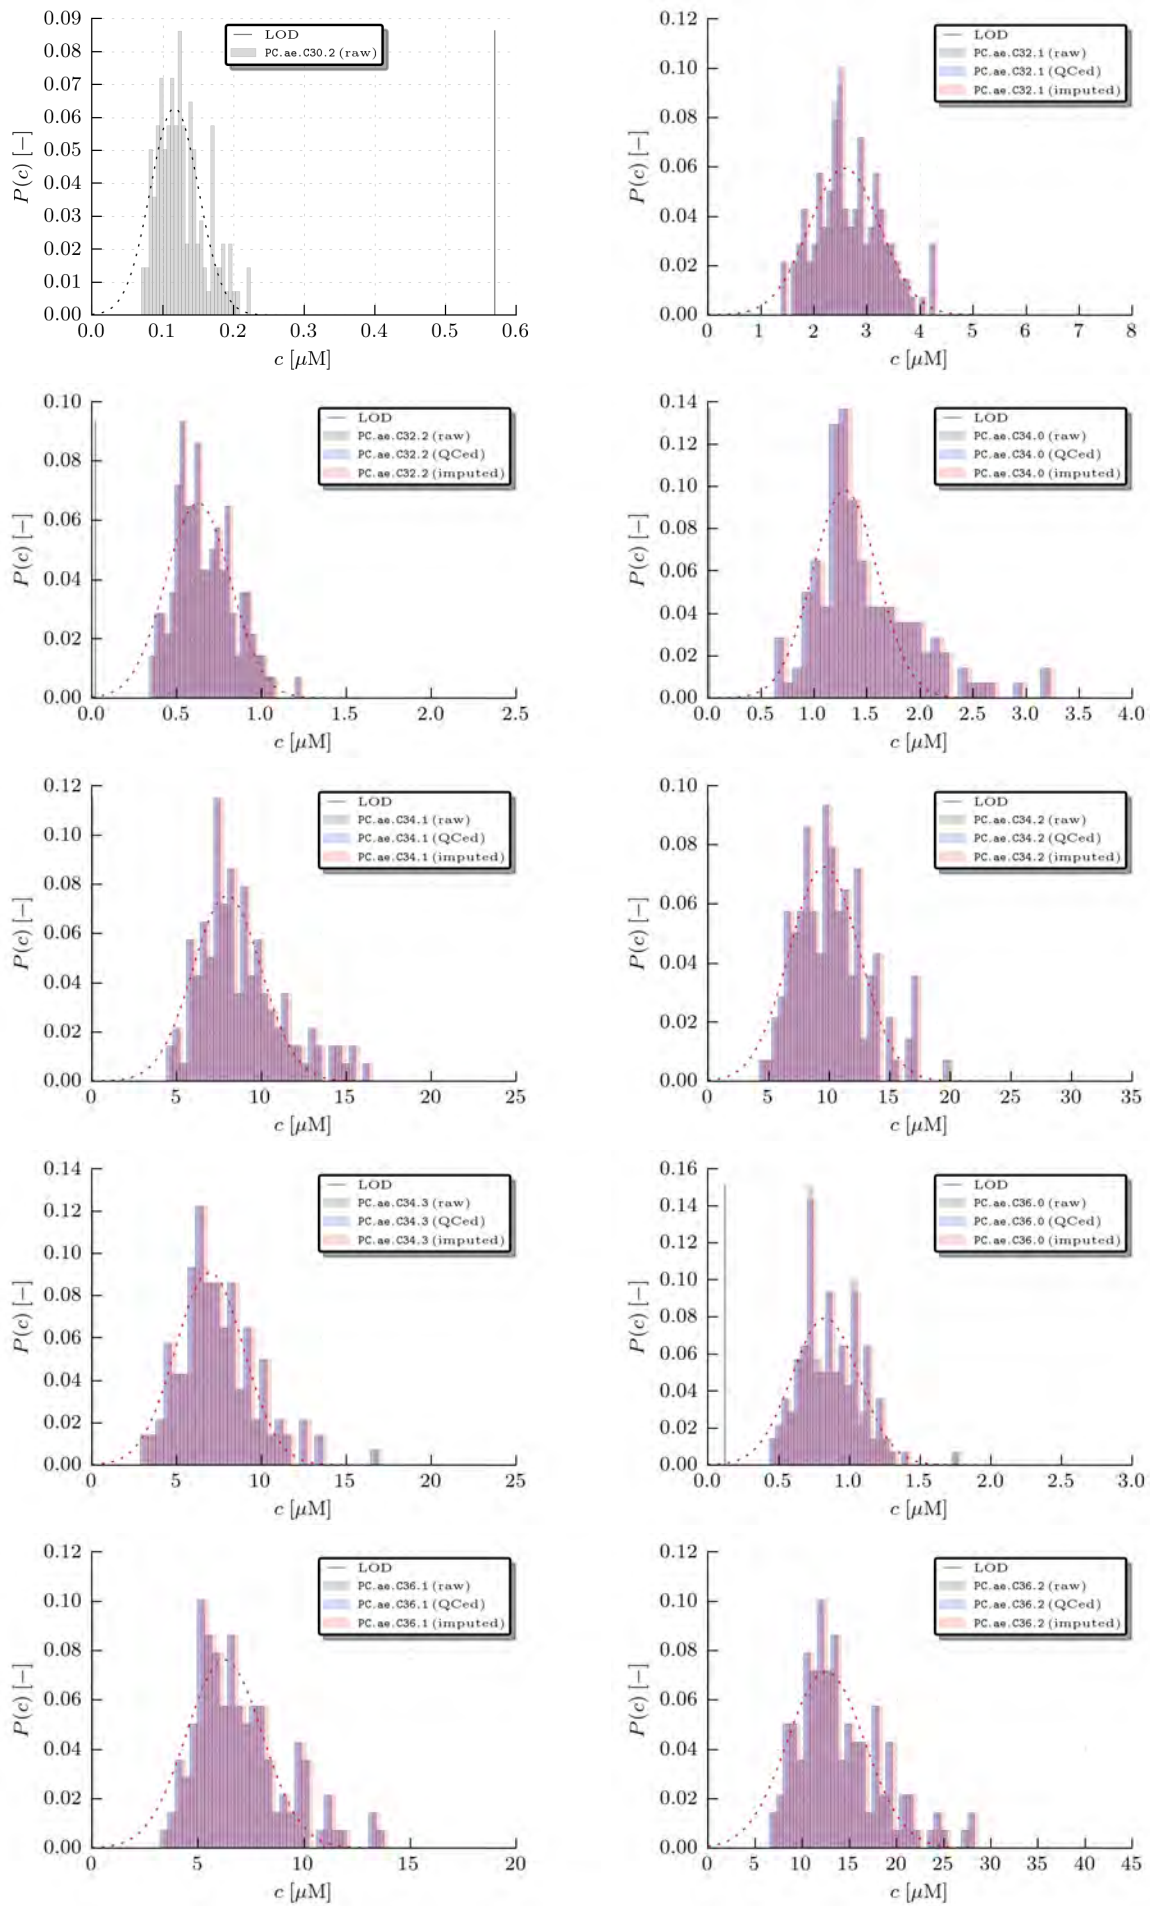

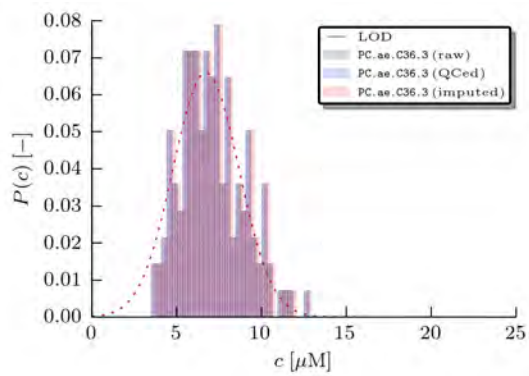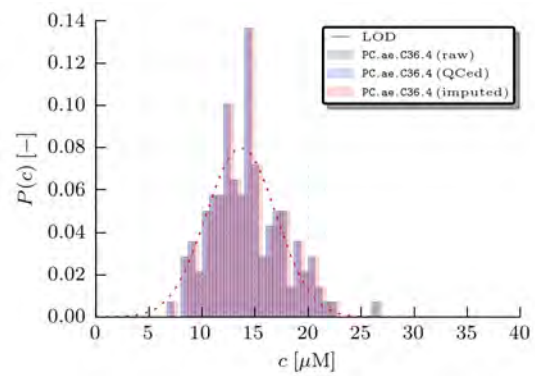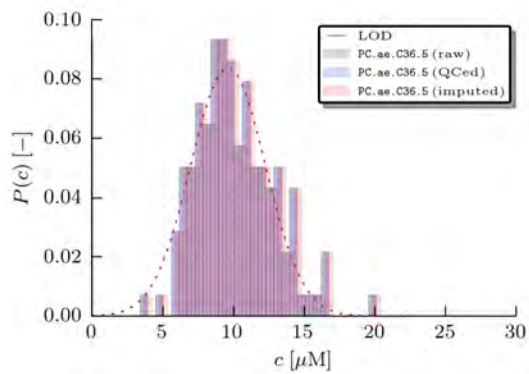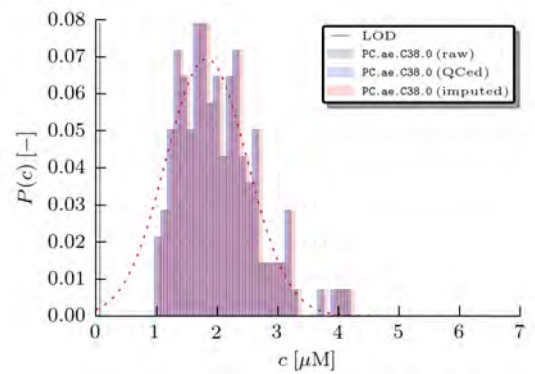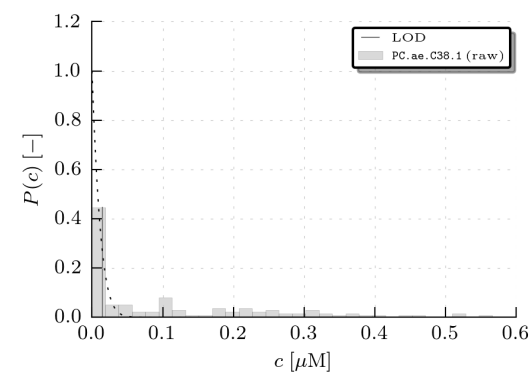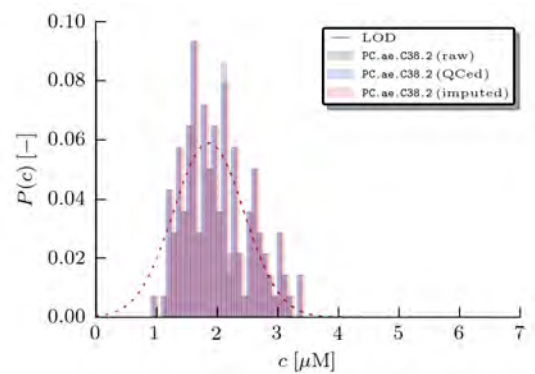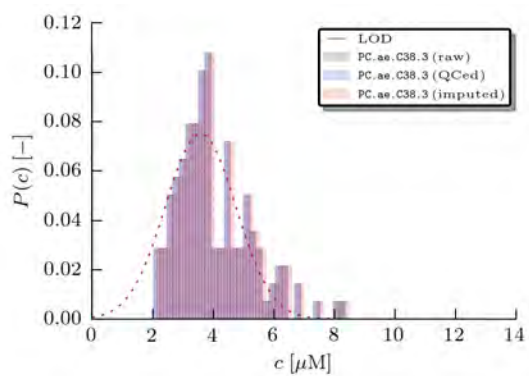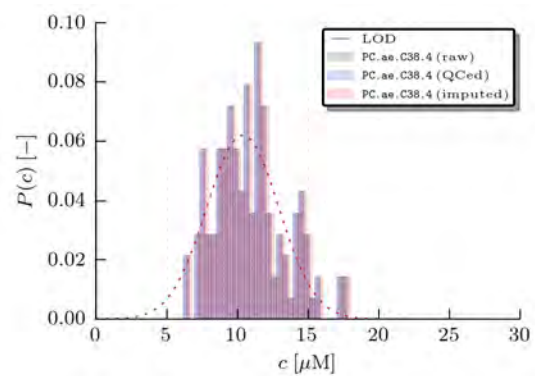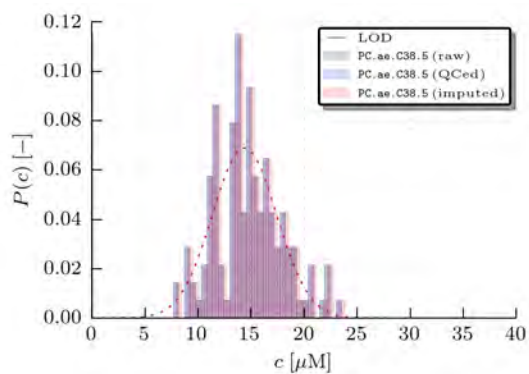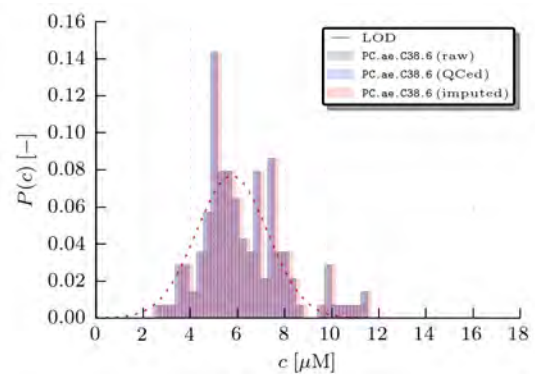



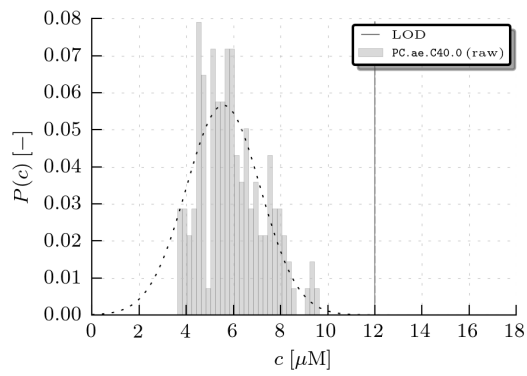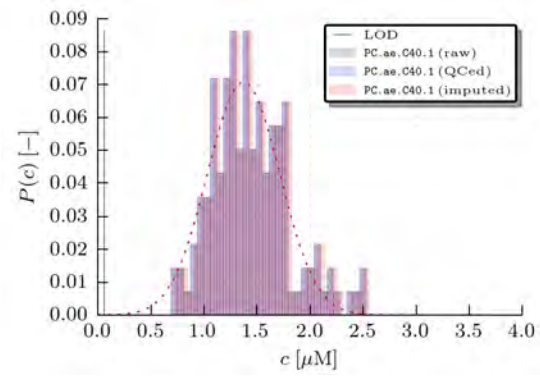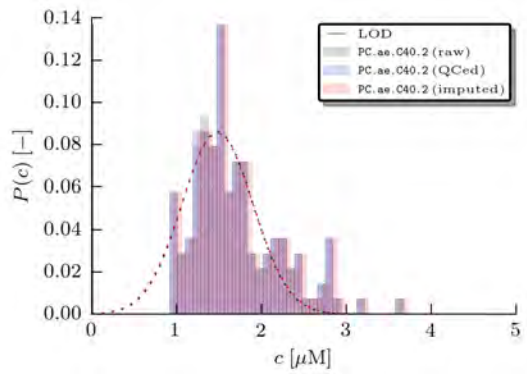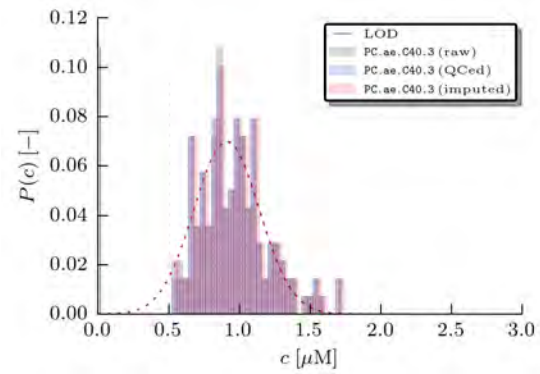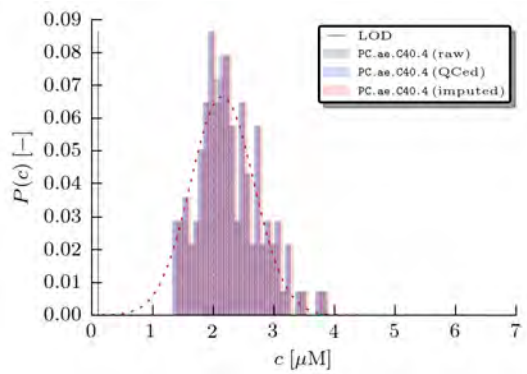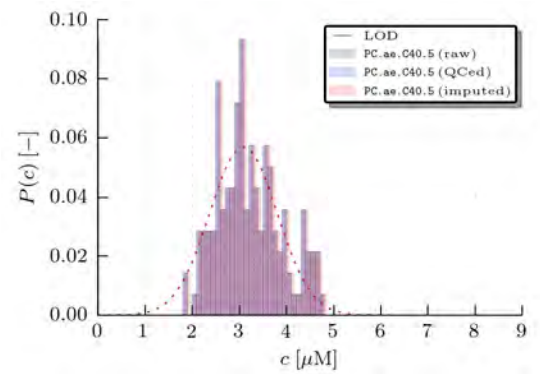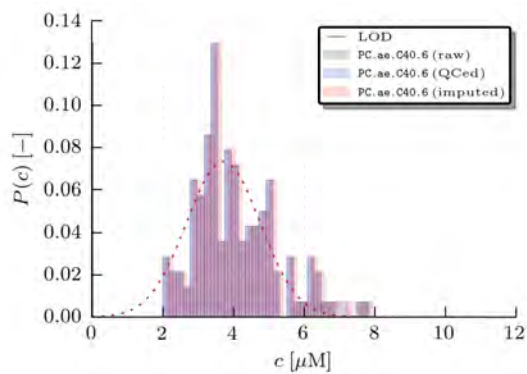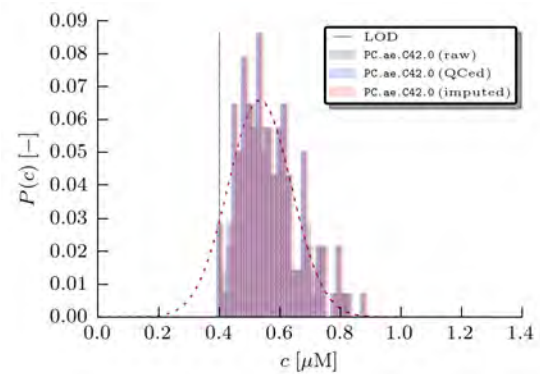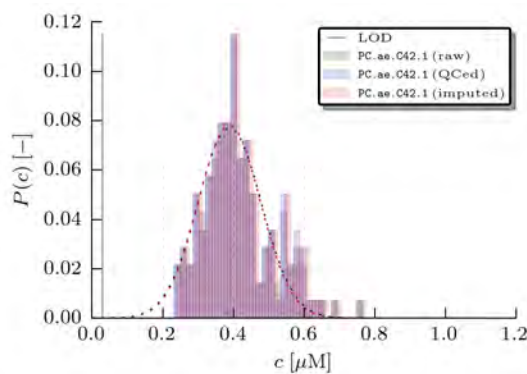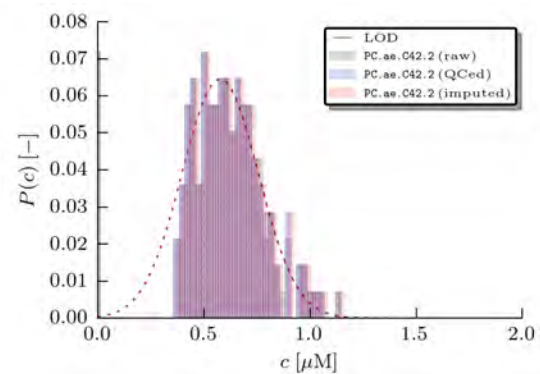

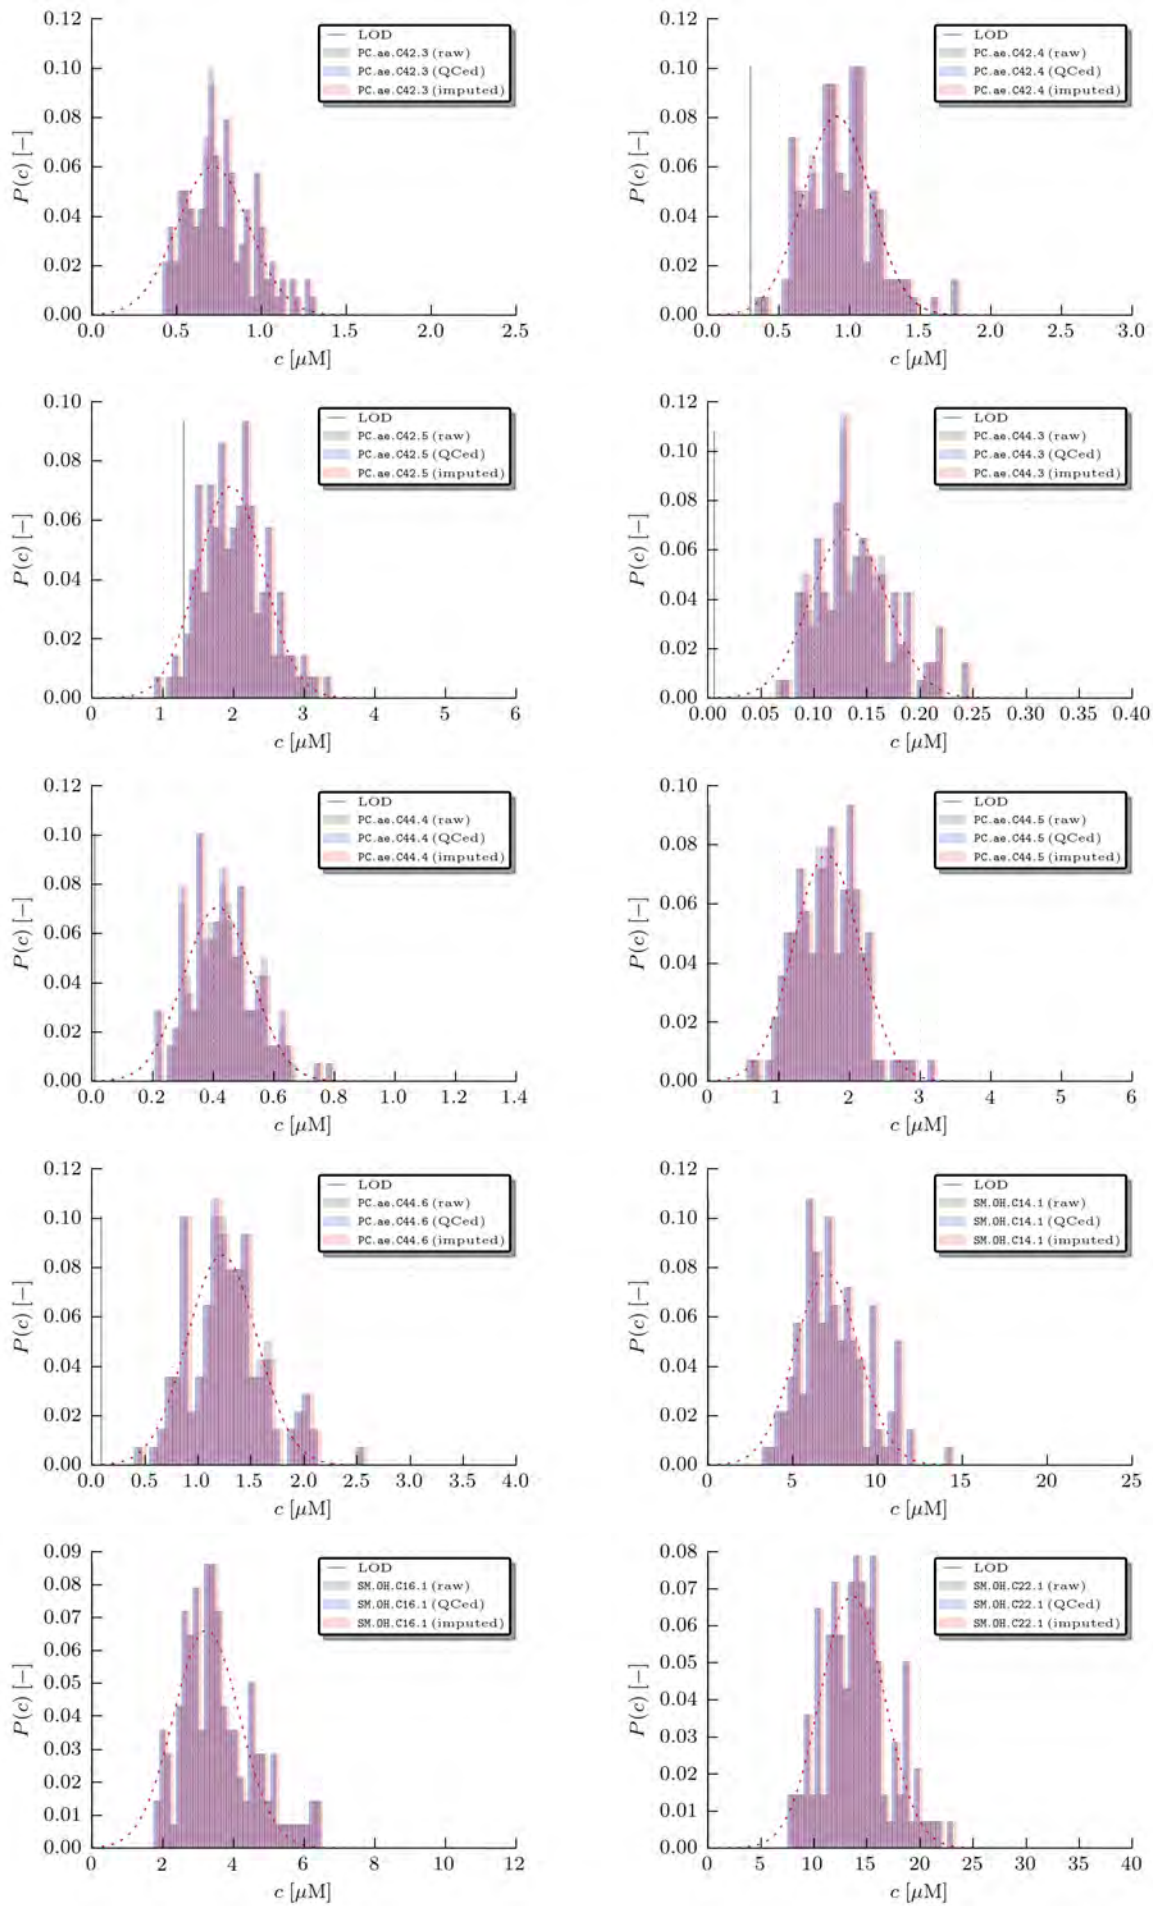

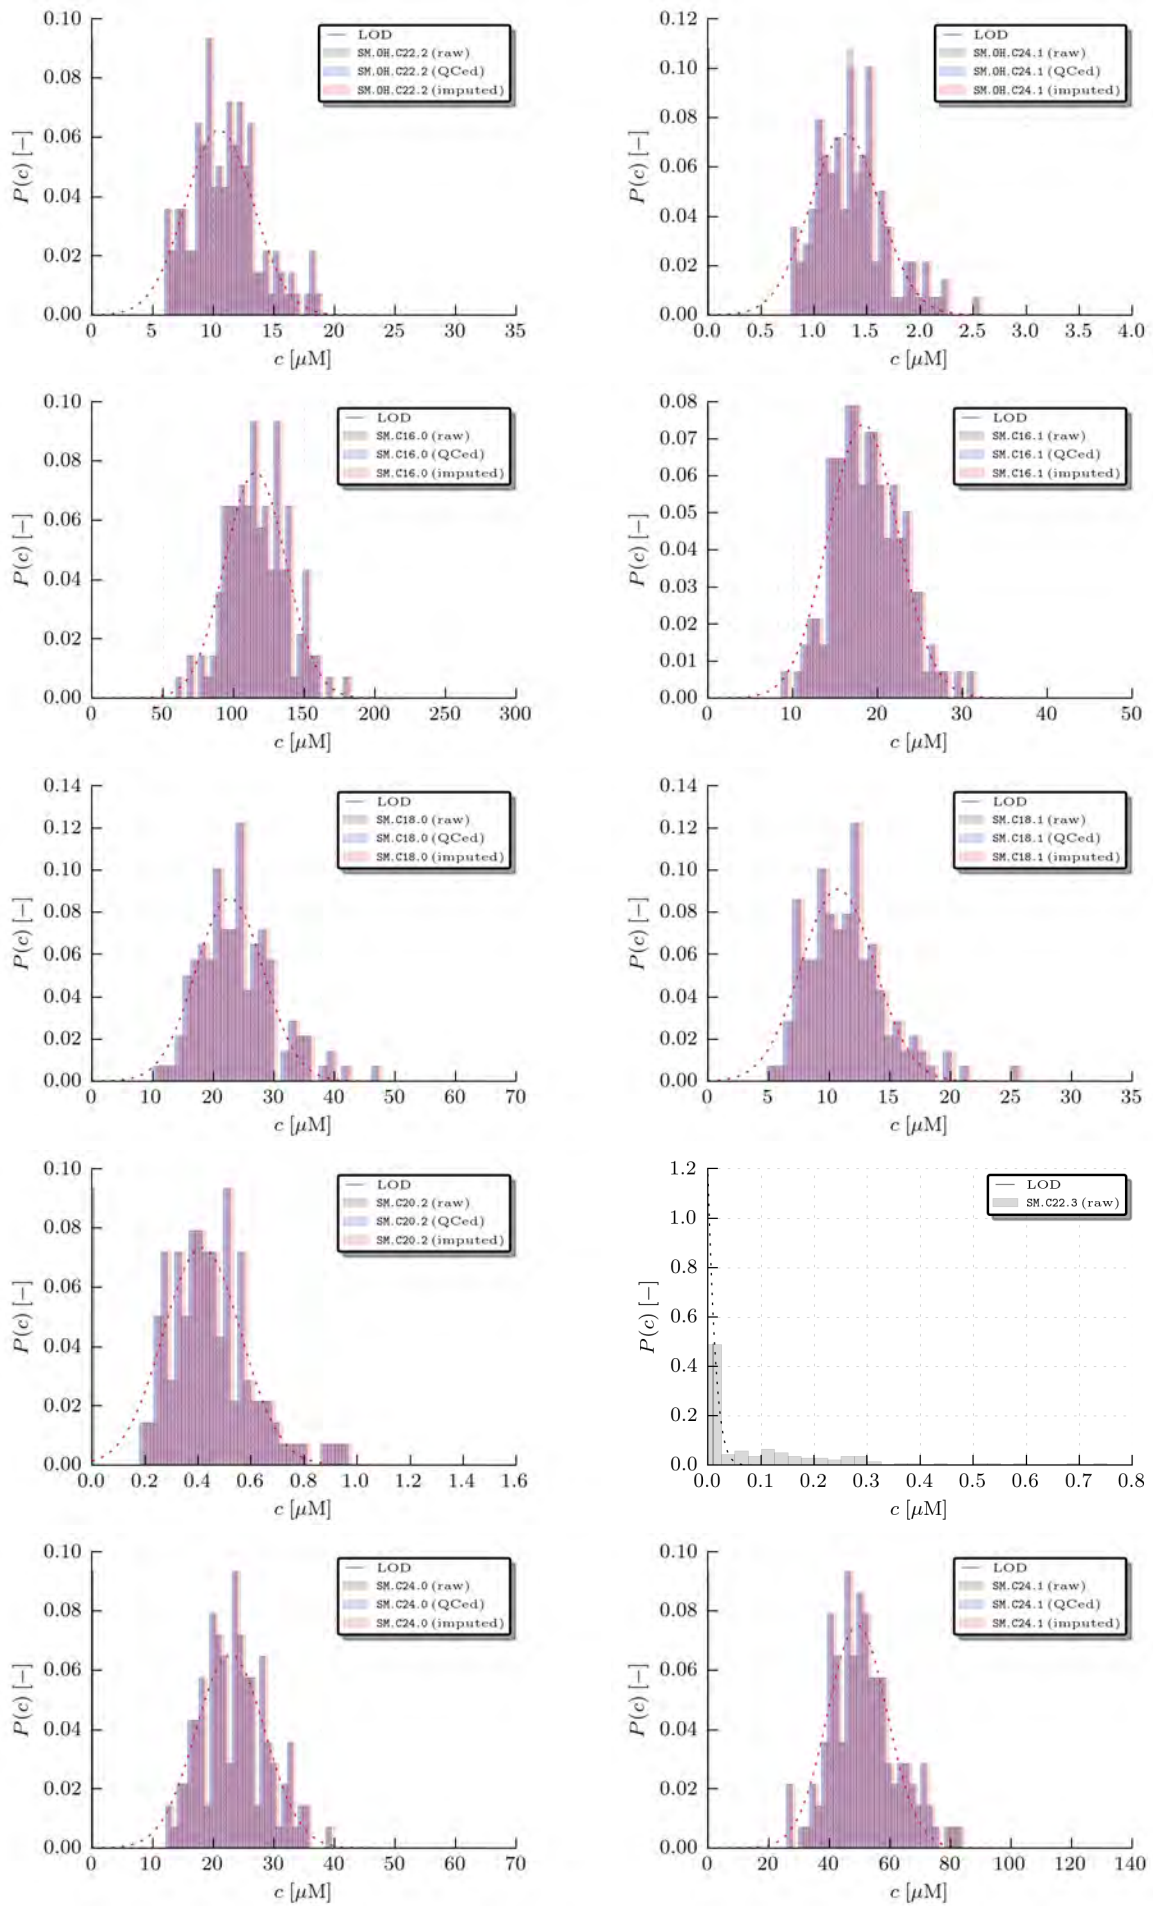

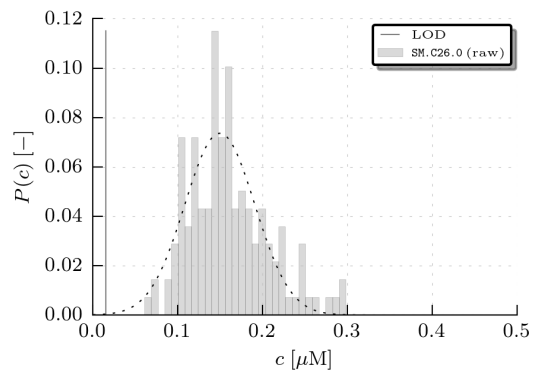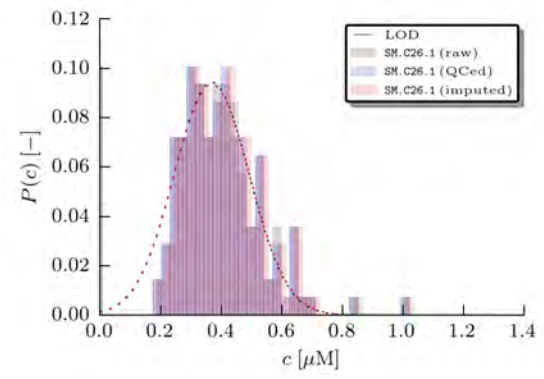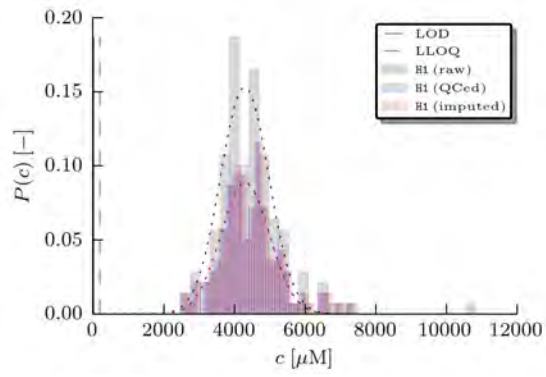

Supplement: MOESM3 [file 11306_2016_1084_MOESM3_ESM.pdf › 11306_2016_1084_MOESM3_ESM.pdf]
