# Supplementary material for: Integration of targeted metabolomics and transcriptomics identifies deregulation of phosphatidylcholine metabolism in Huntington’s disease peripheral blood samples
Source: Springer Nature journal article supplement (doi:10.1007/s11306-016-1084-8), 2016-07-27

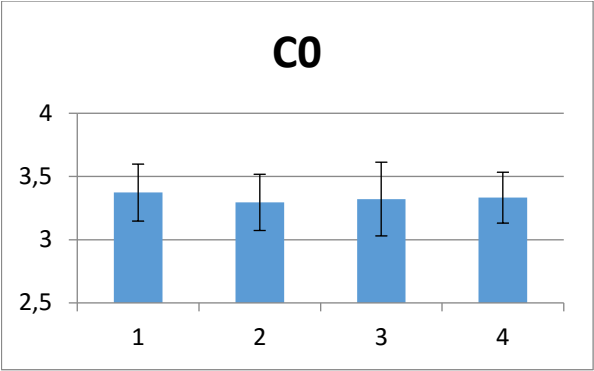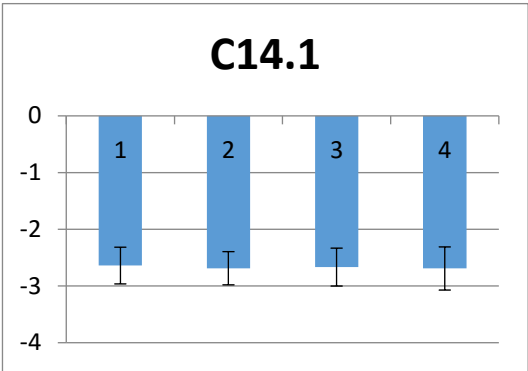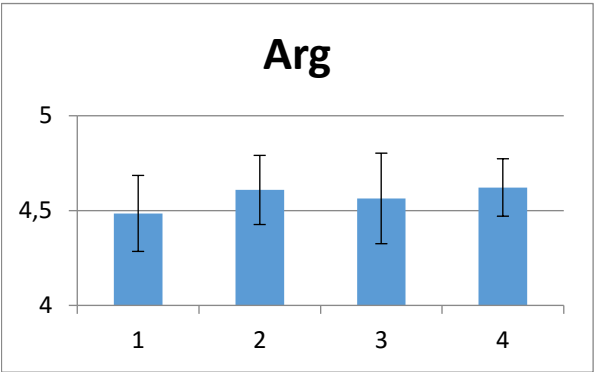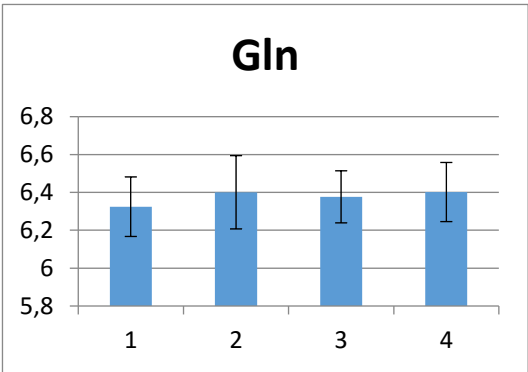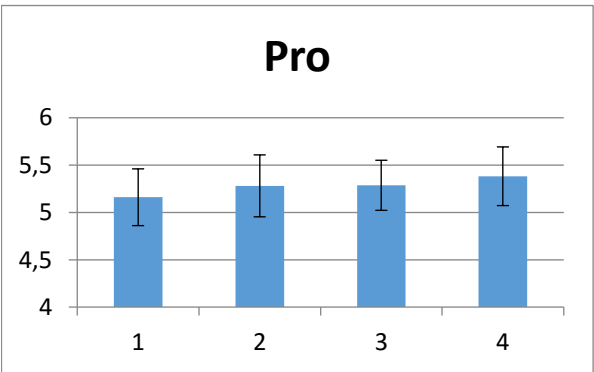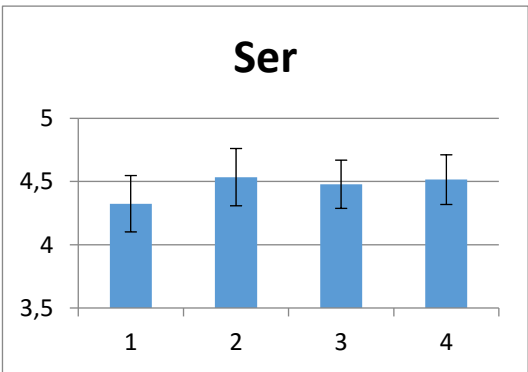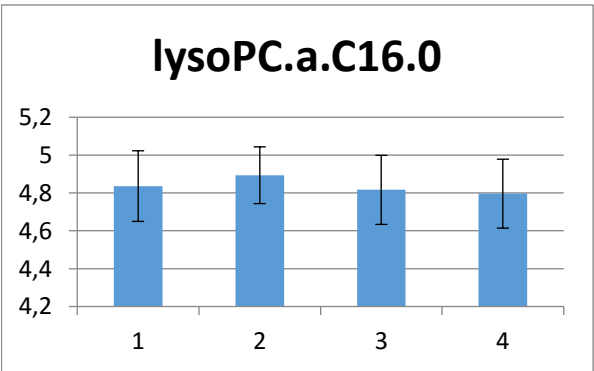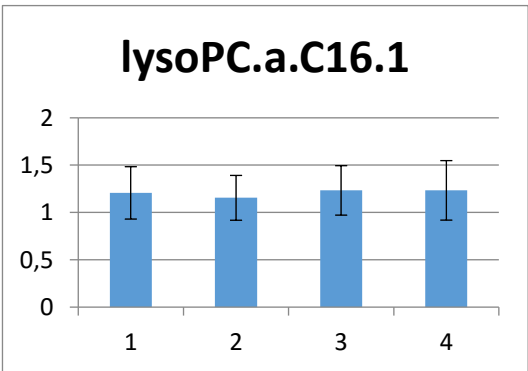

**lysoPC.a.C20.4**

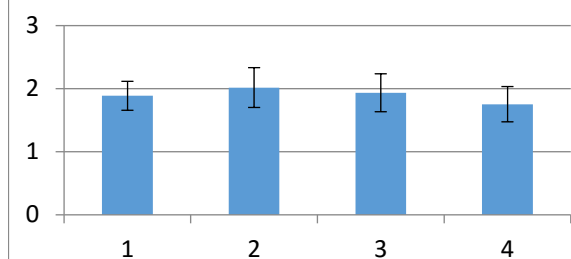

**lysoPC.a.C28.0**

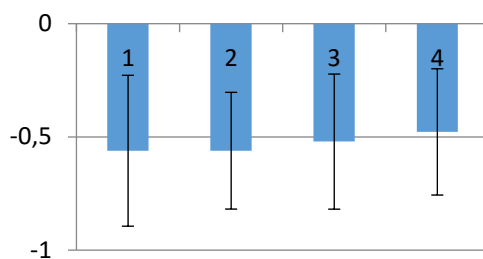

**PC.aa.C32.2**

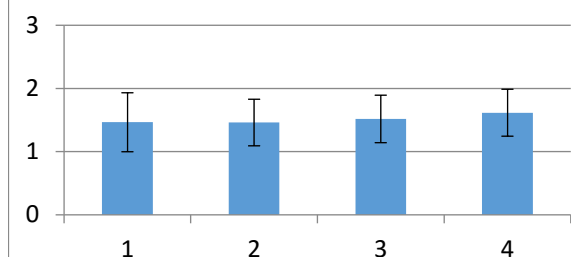

**PC.aa.C32.3**

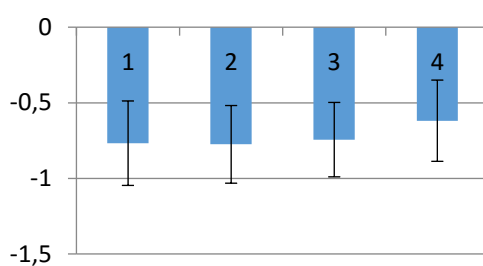

**PC.aa.C36.1**

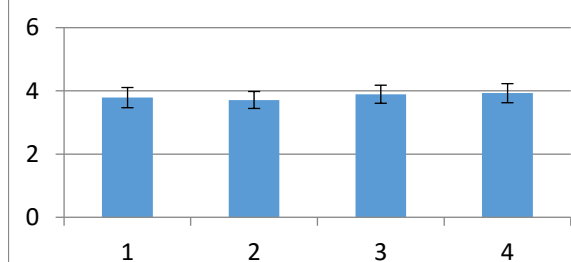

**PC.aa.C36.2**

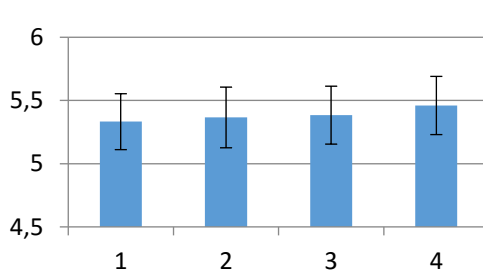

**PC.aa.C38.1**

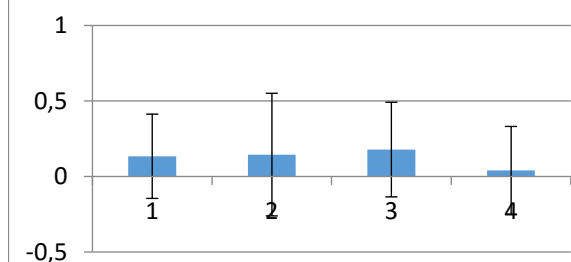

**PC.aa.C38.3**

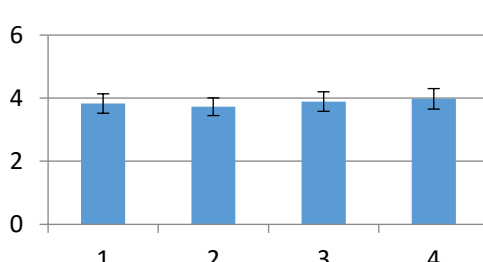

**PC.aa.C40.4**

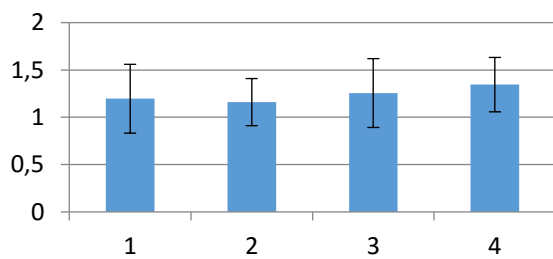

**PC.aa.C40.5**

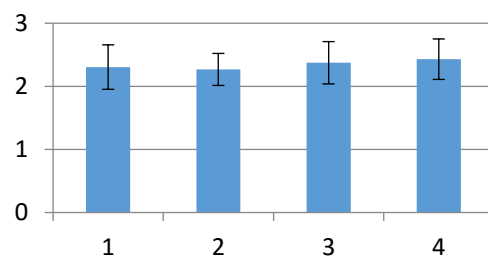

**PC.aa.C42.5**

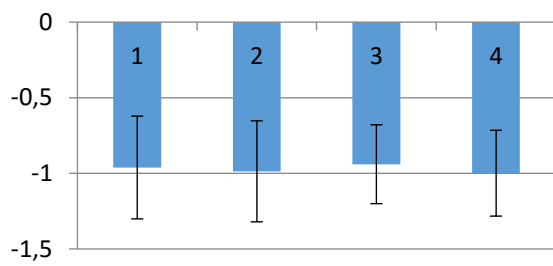

**PC.aa.C42.6**

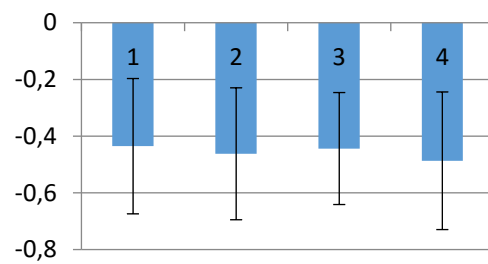

**PC.ae.C34.2**

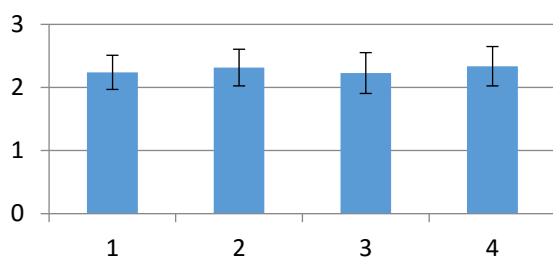

**PC.ae.C34.3**

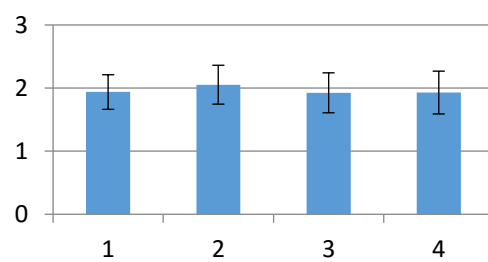

**PC.ae.C36.5**

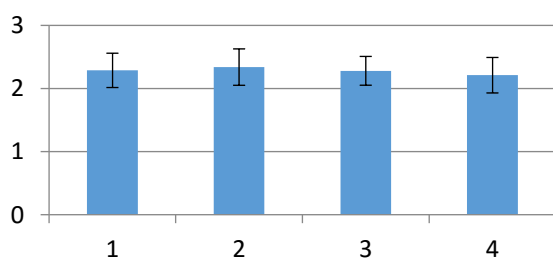

**PC.ae.C38.0**

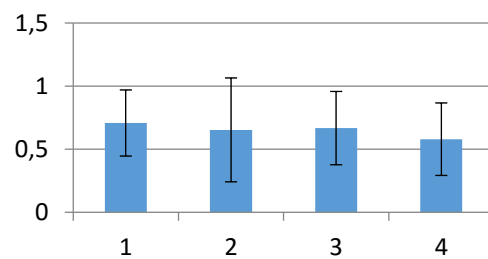

**PC.ae.C40.1**

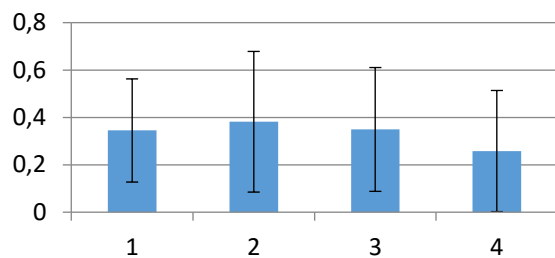

**PC.ae.C40.2**

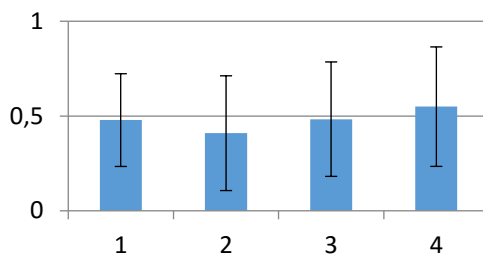

**PC.ae.C42.1**

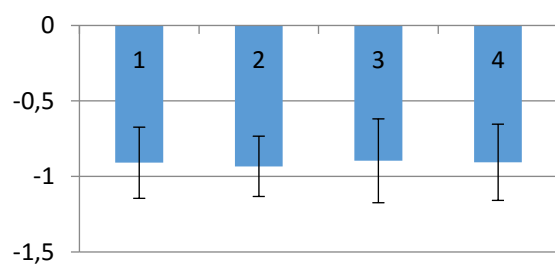

**PC.ae.C42.2**

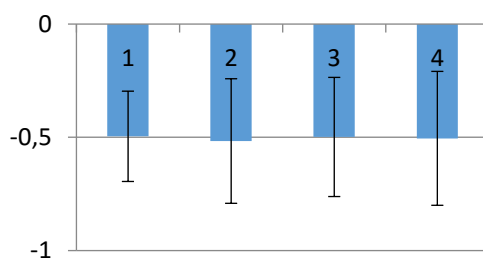

**PC.ae.C44.5**

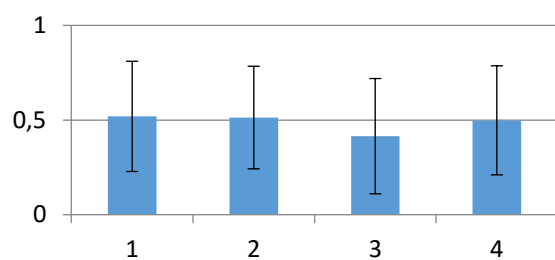

**PC.ae.C44.6**

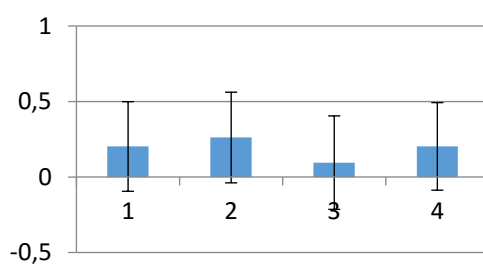

**SM.C16.0**

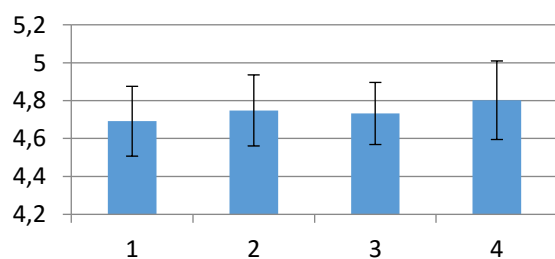

**SM.C16.1**

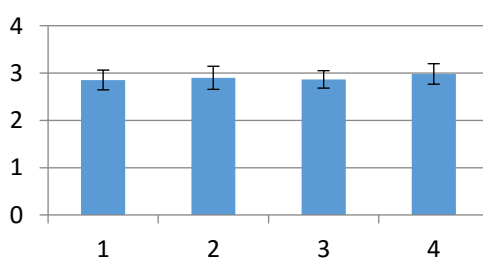

**C18.1**

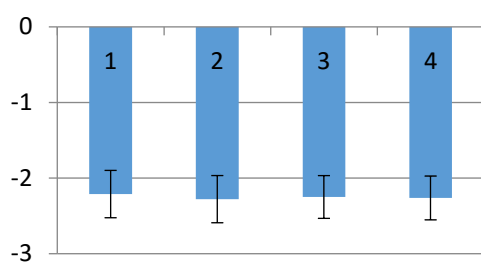

**C18.2**

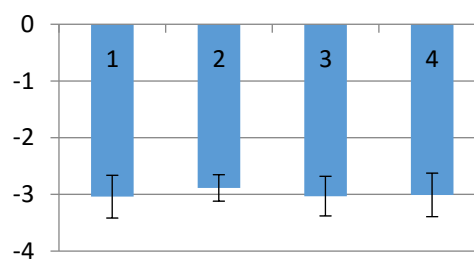

**Gly**

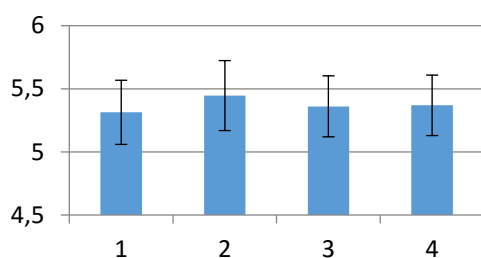

**His**

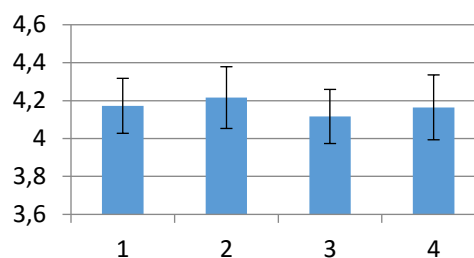

**Thr**

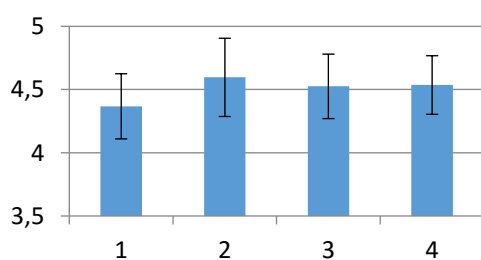

**Trp**

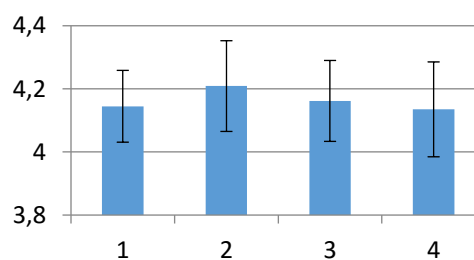

**lysoPC.a.C17.0**

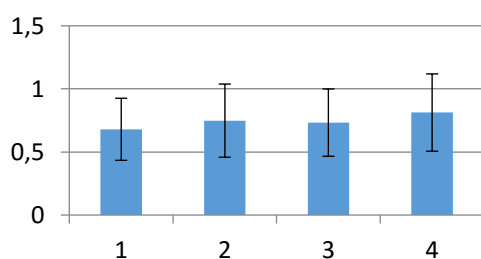

**lysoPC.a.C18.0**

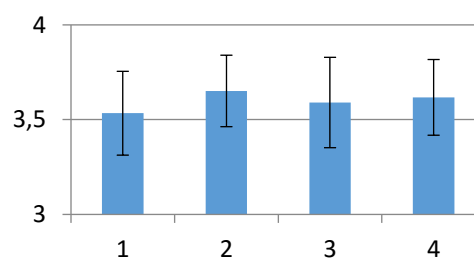

**lysoPC.a.C28.1**

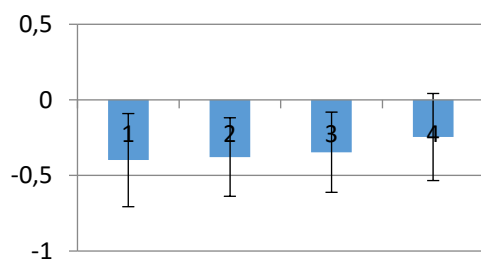

**PC.aa.C28.1**

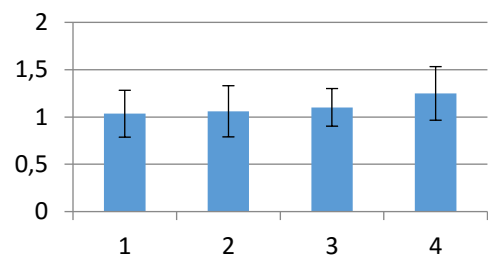

**PC.aa.C34.1**

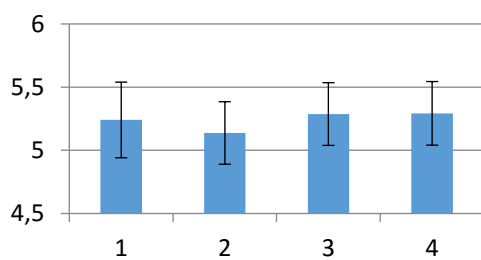

**PC.aa.C34.2**

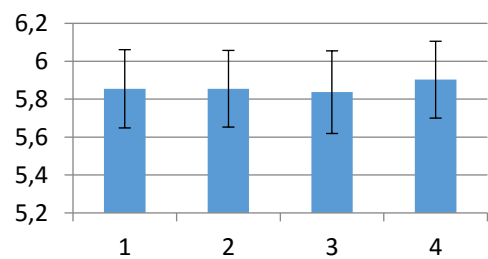

**PC.aa.C36.3**

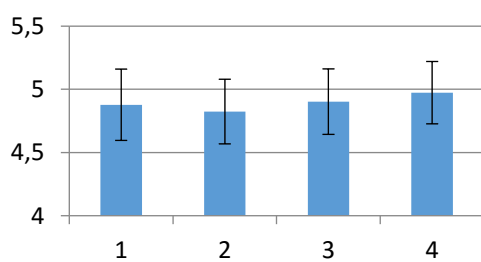

**PC.aa.C36.4**

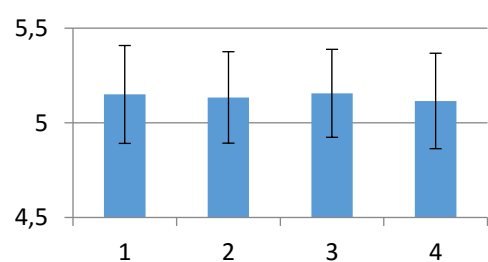

**PC.aa.C38.4**

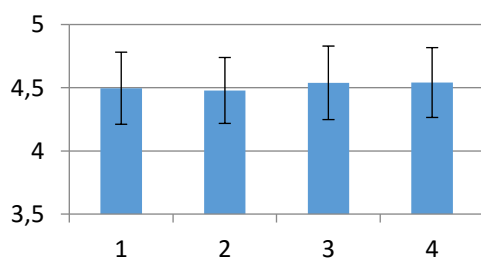

**PC.aa.C38.5**

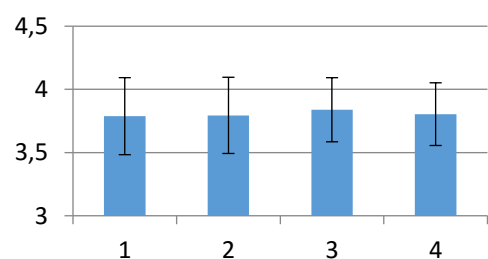

**PC.aa.C40.6**

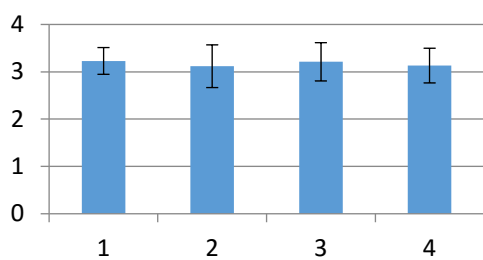

**PC.aa.C42.0**

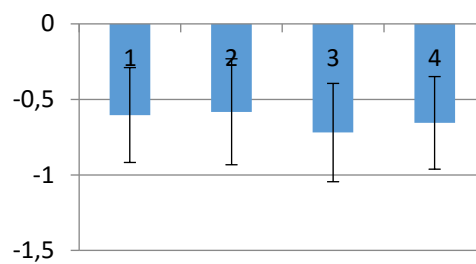

**PC.ae.C30.0**

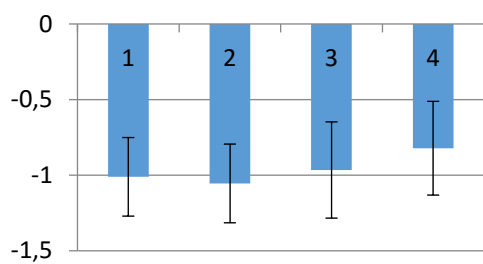

**PC.ae.C32.1**

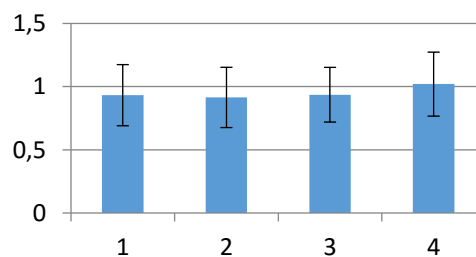

**PC.ae.C36.0**

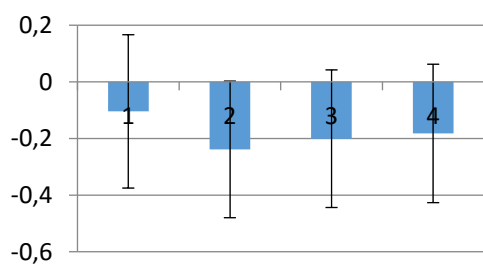

**PC.ae.C36.1**

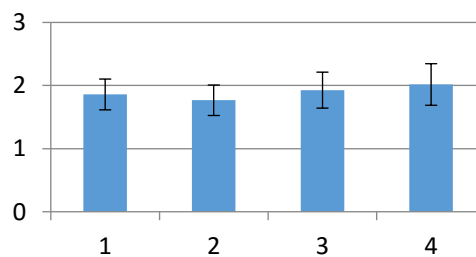

**PC.ae.C38.2**

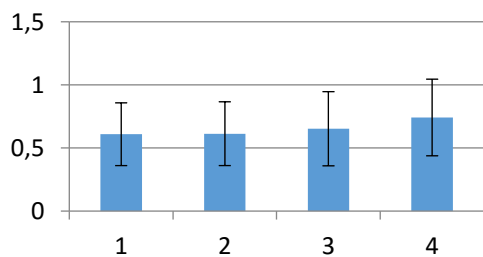

**PC.ae.C38.3**

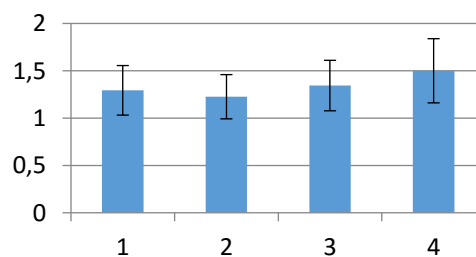

**PC.ae.C40.3**

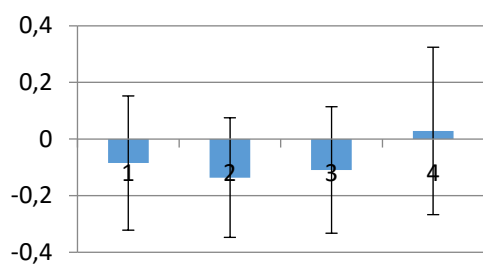

**PC.ae.C40.4**

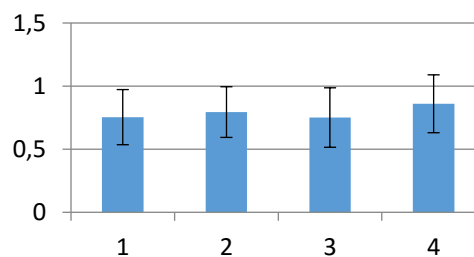

**PC.ae.C42.3**

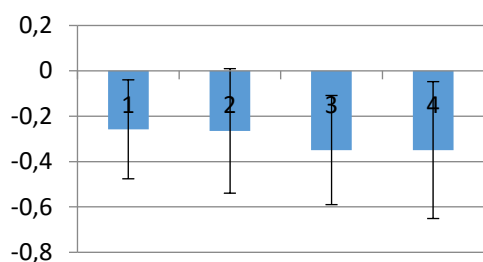

**PC.ae.C42.4**

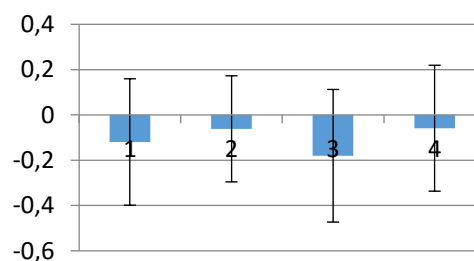

**SM.OH.C14.1**

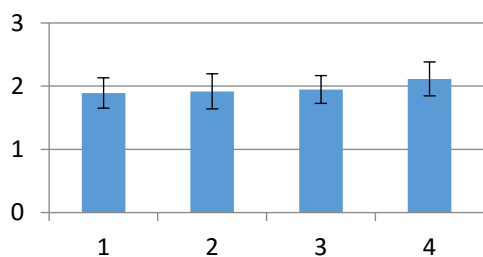

**SM.OH.C16.1**

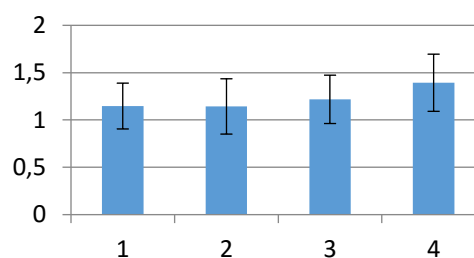

**SM.C18.0**

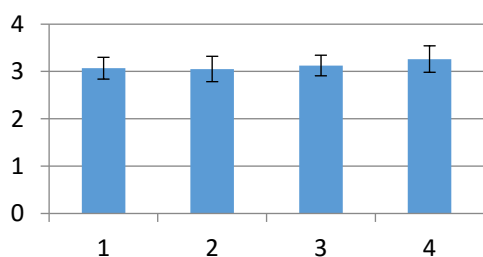

**SM.C18.1**

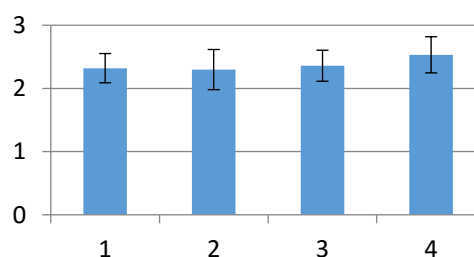

**SM.C26.1**

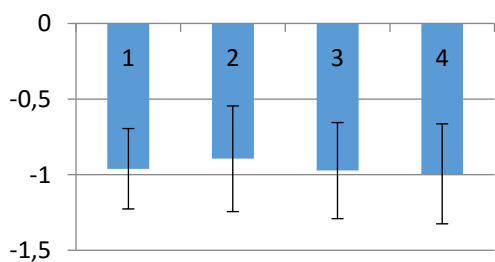

**H1**

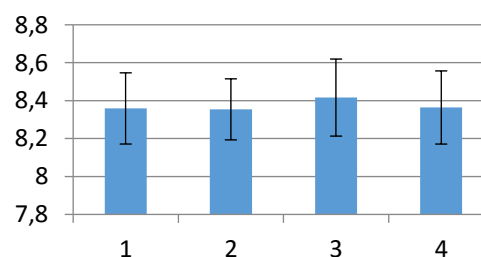



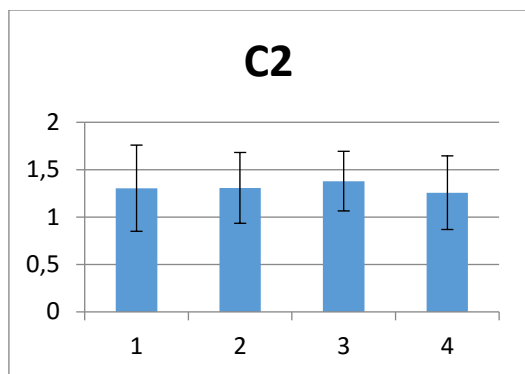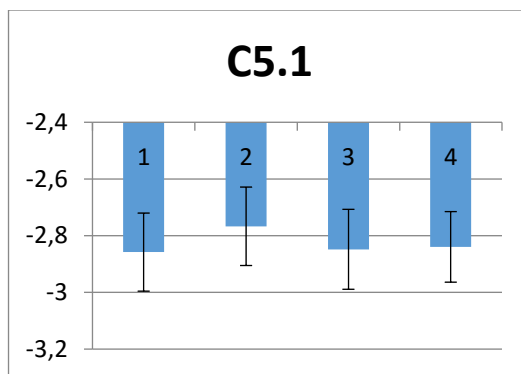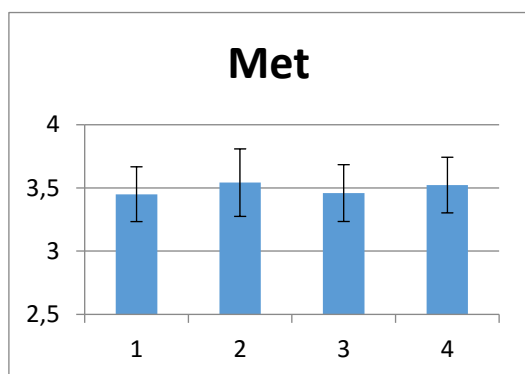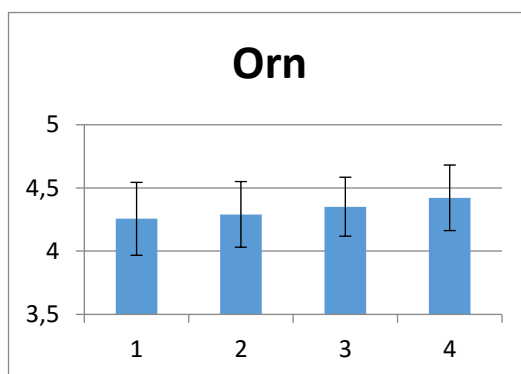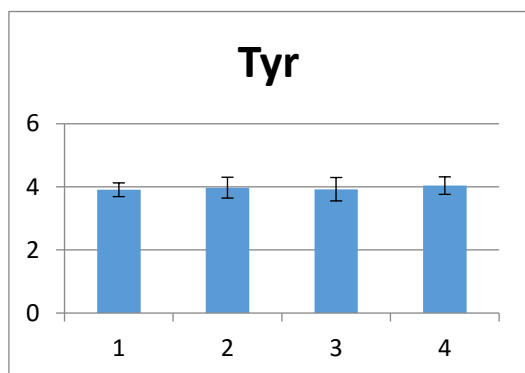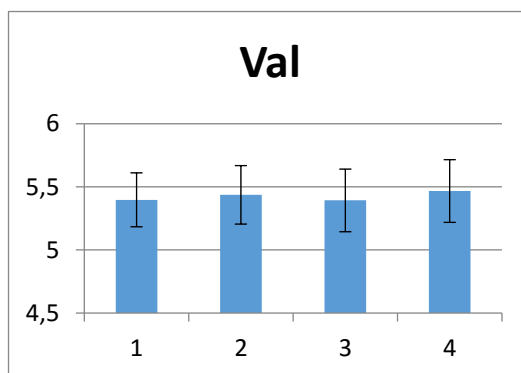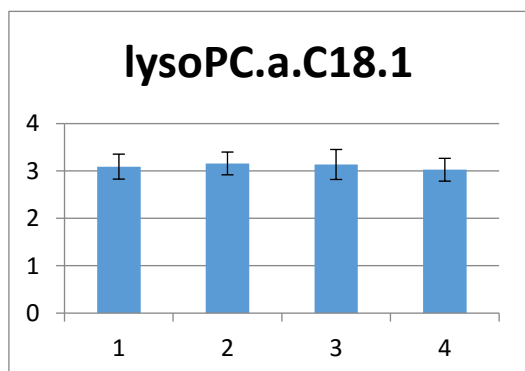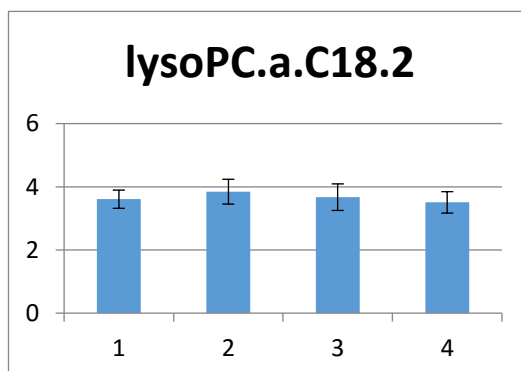

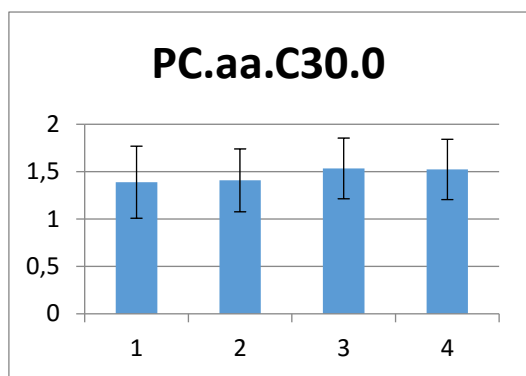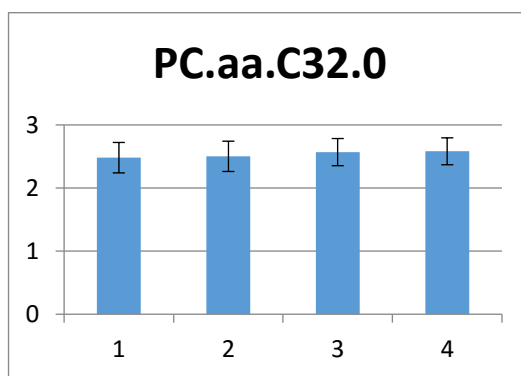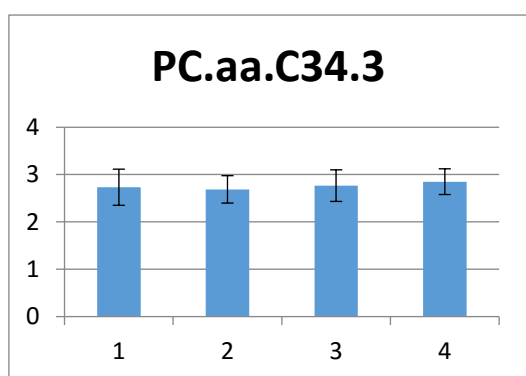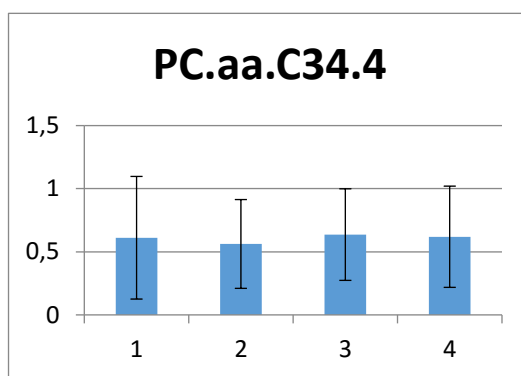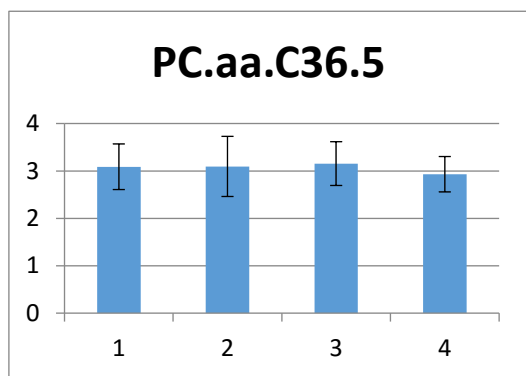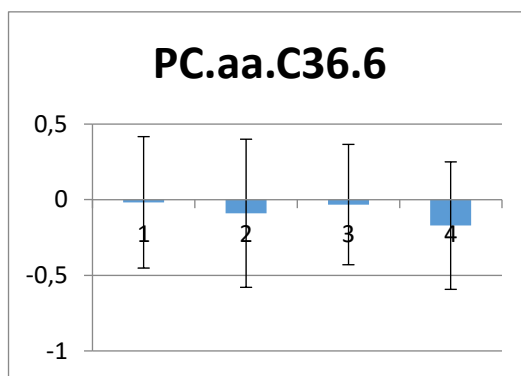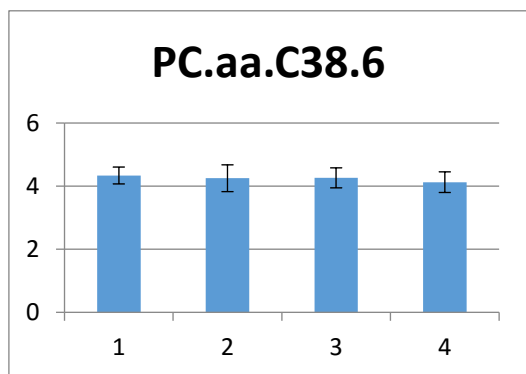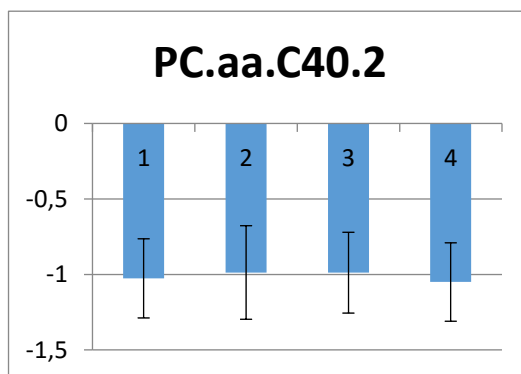

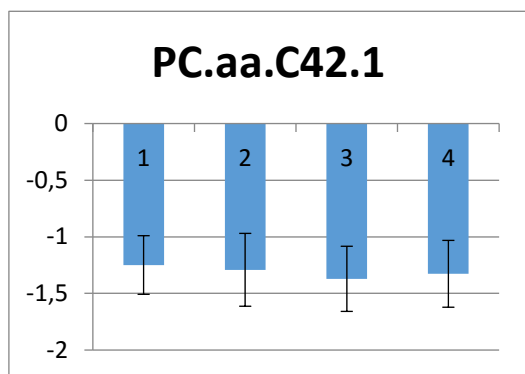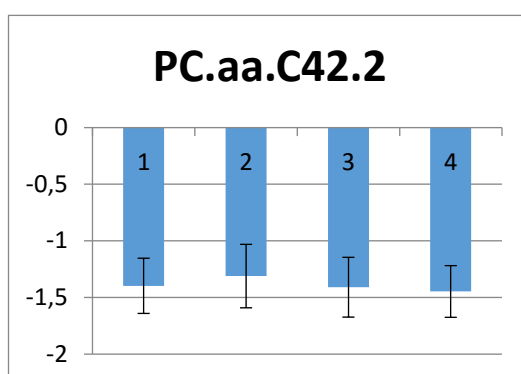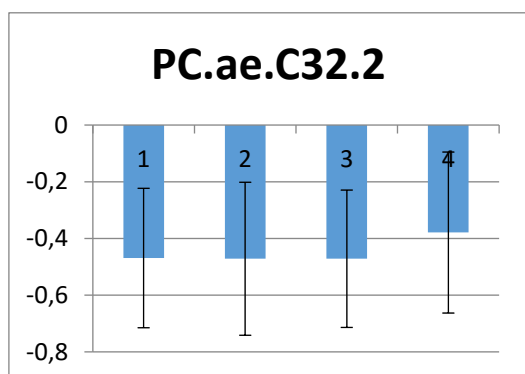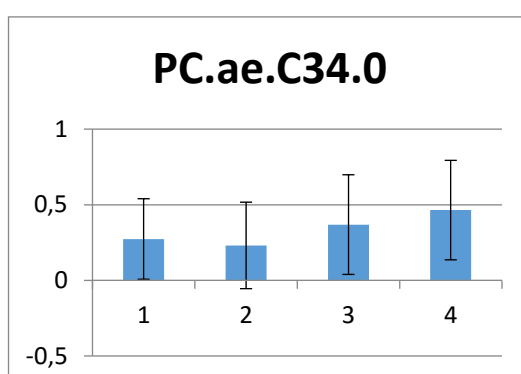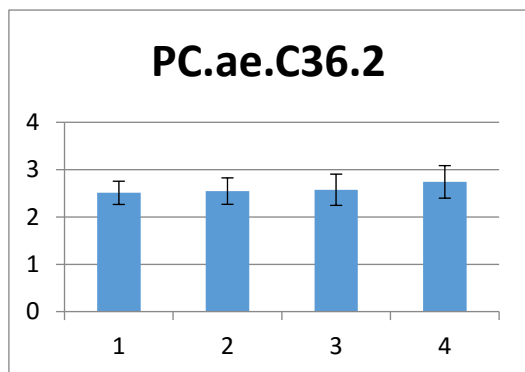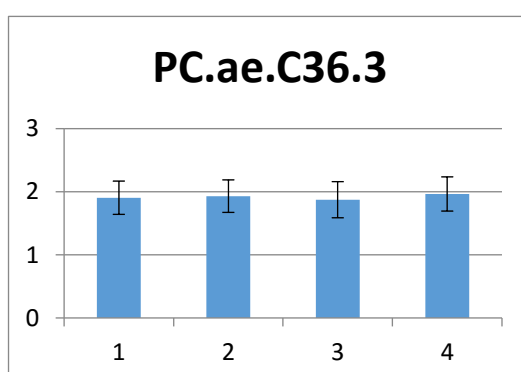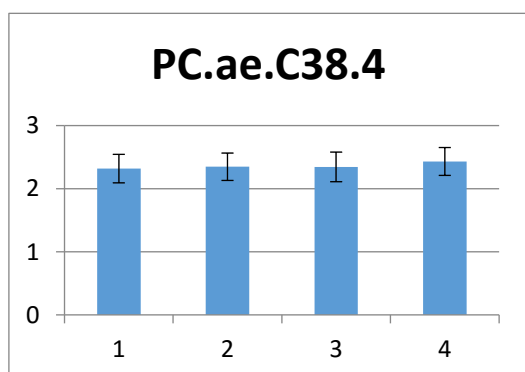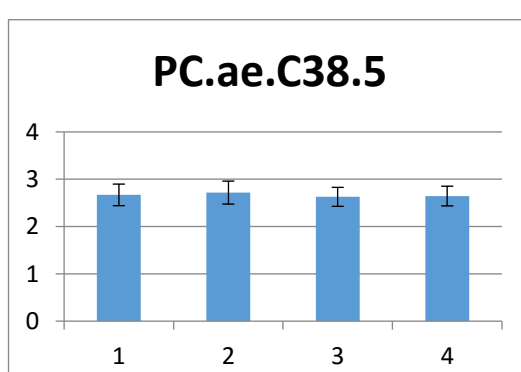

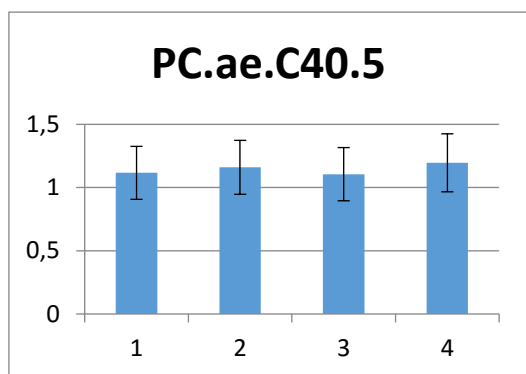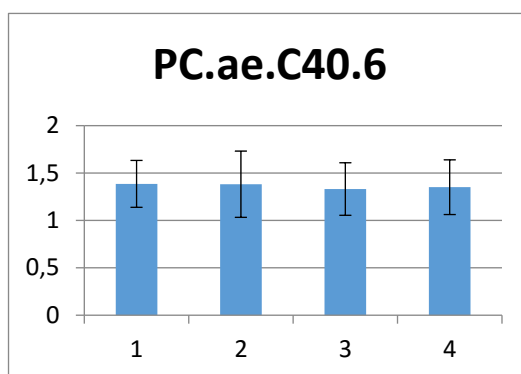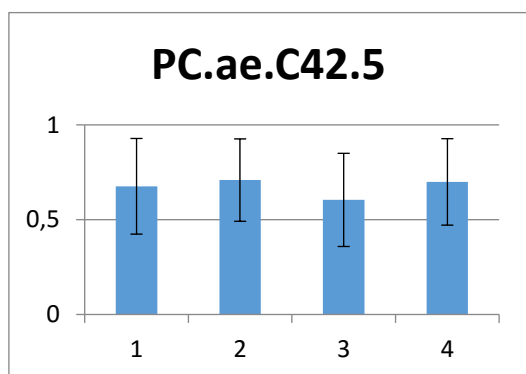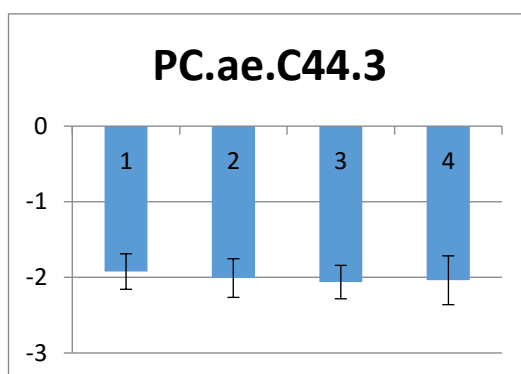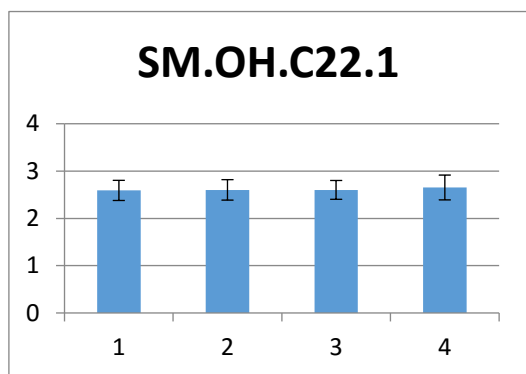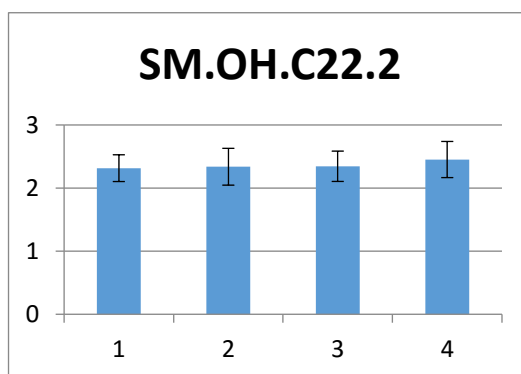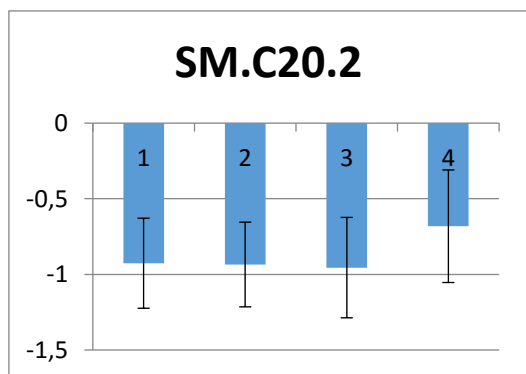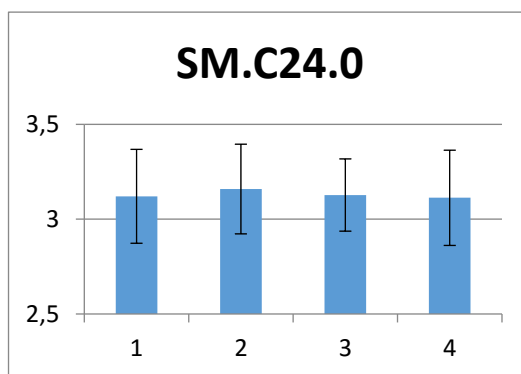

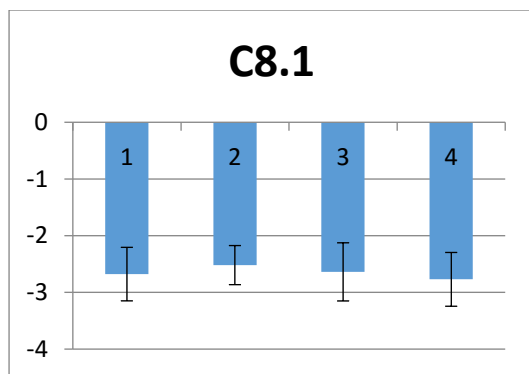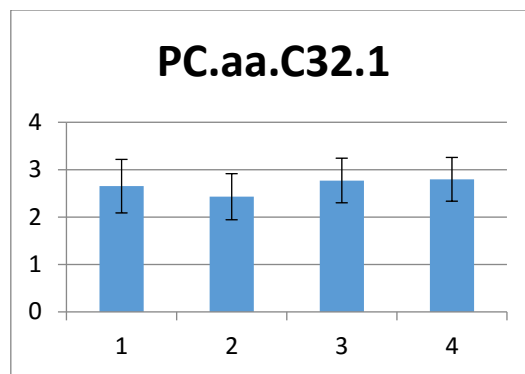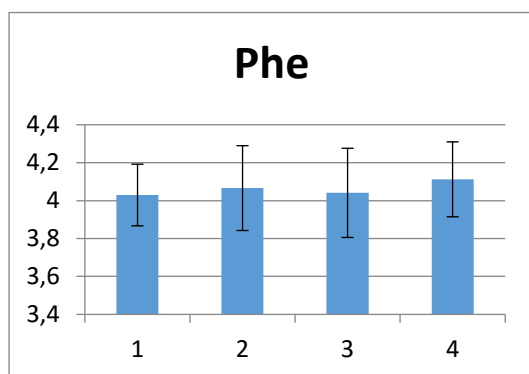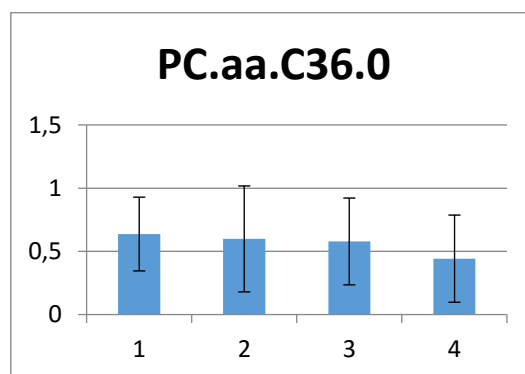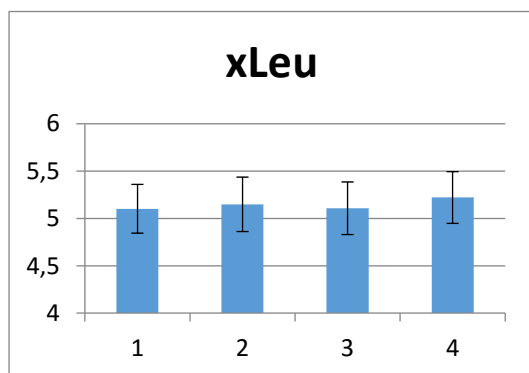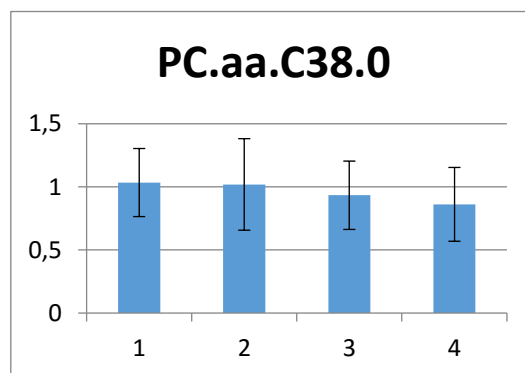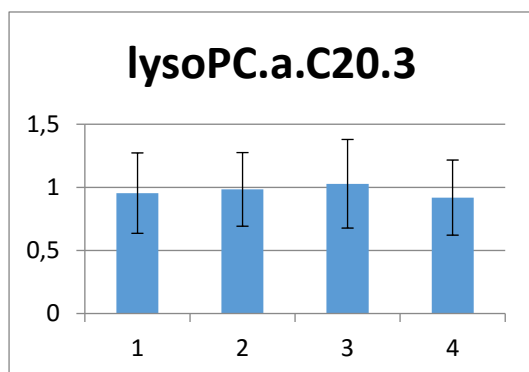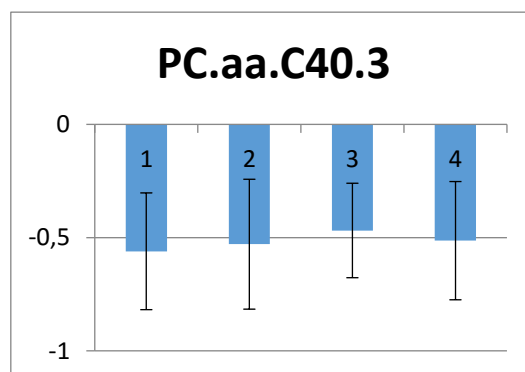

**PC.aa.C42.4**

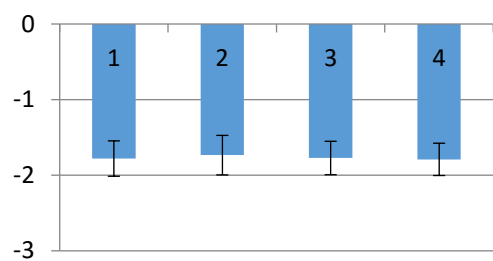

**PC.ae.C42.0**

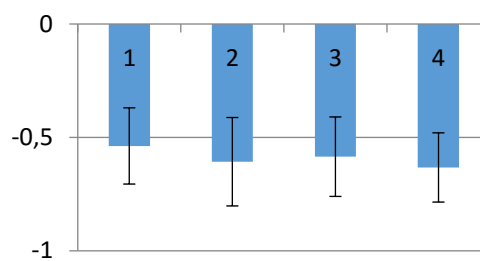

**PC.ae.C34.1**

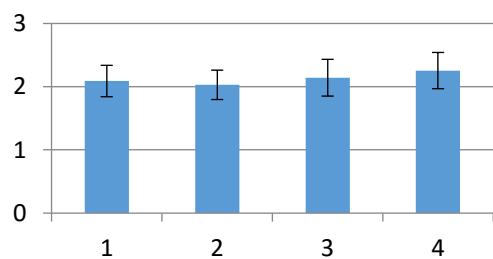

**PC.ae.C44.4**

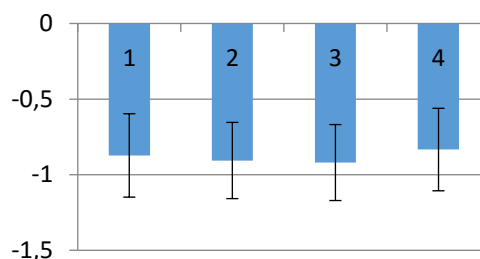

**PC.ae.C36.4**

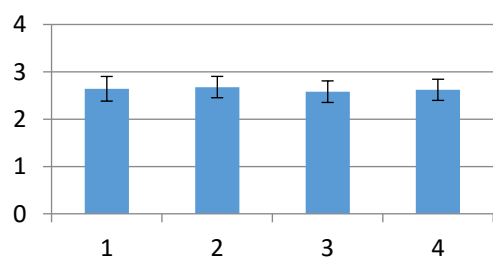

**SM.OH.C24.1**

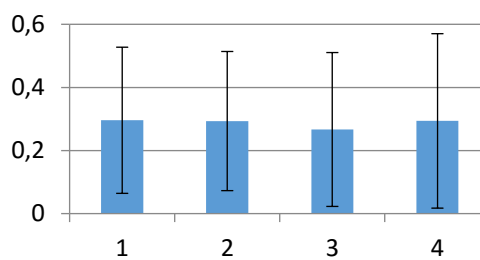

**PC.ae.C38.6**

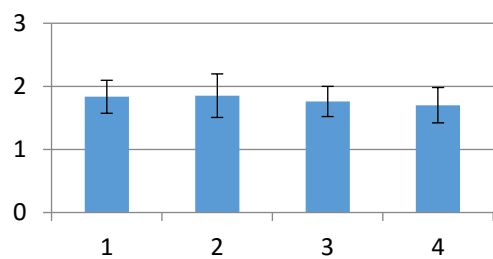

**SM.C24.1**

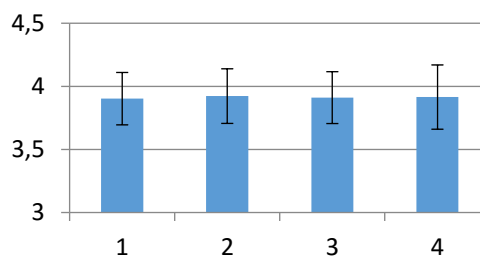

Supplement: MOESM4 [file 11306_2016_1084_MOESM4_ESM.pdf › 11306_2016_1084_MOESM4_ESM.pdf]
