# Supplementary material for: Integration of targeted metabolomics and transcriptomics identifies deregulation of phosphatidylcholine metabolism in Huntington’s disease peripheral blood samples
Source: Springer Nature journal article supplement (doi:10.1007/s11306-016-1084-8), 2016-07-27

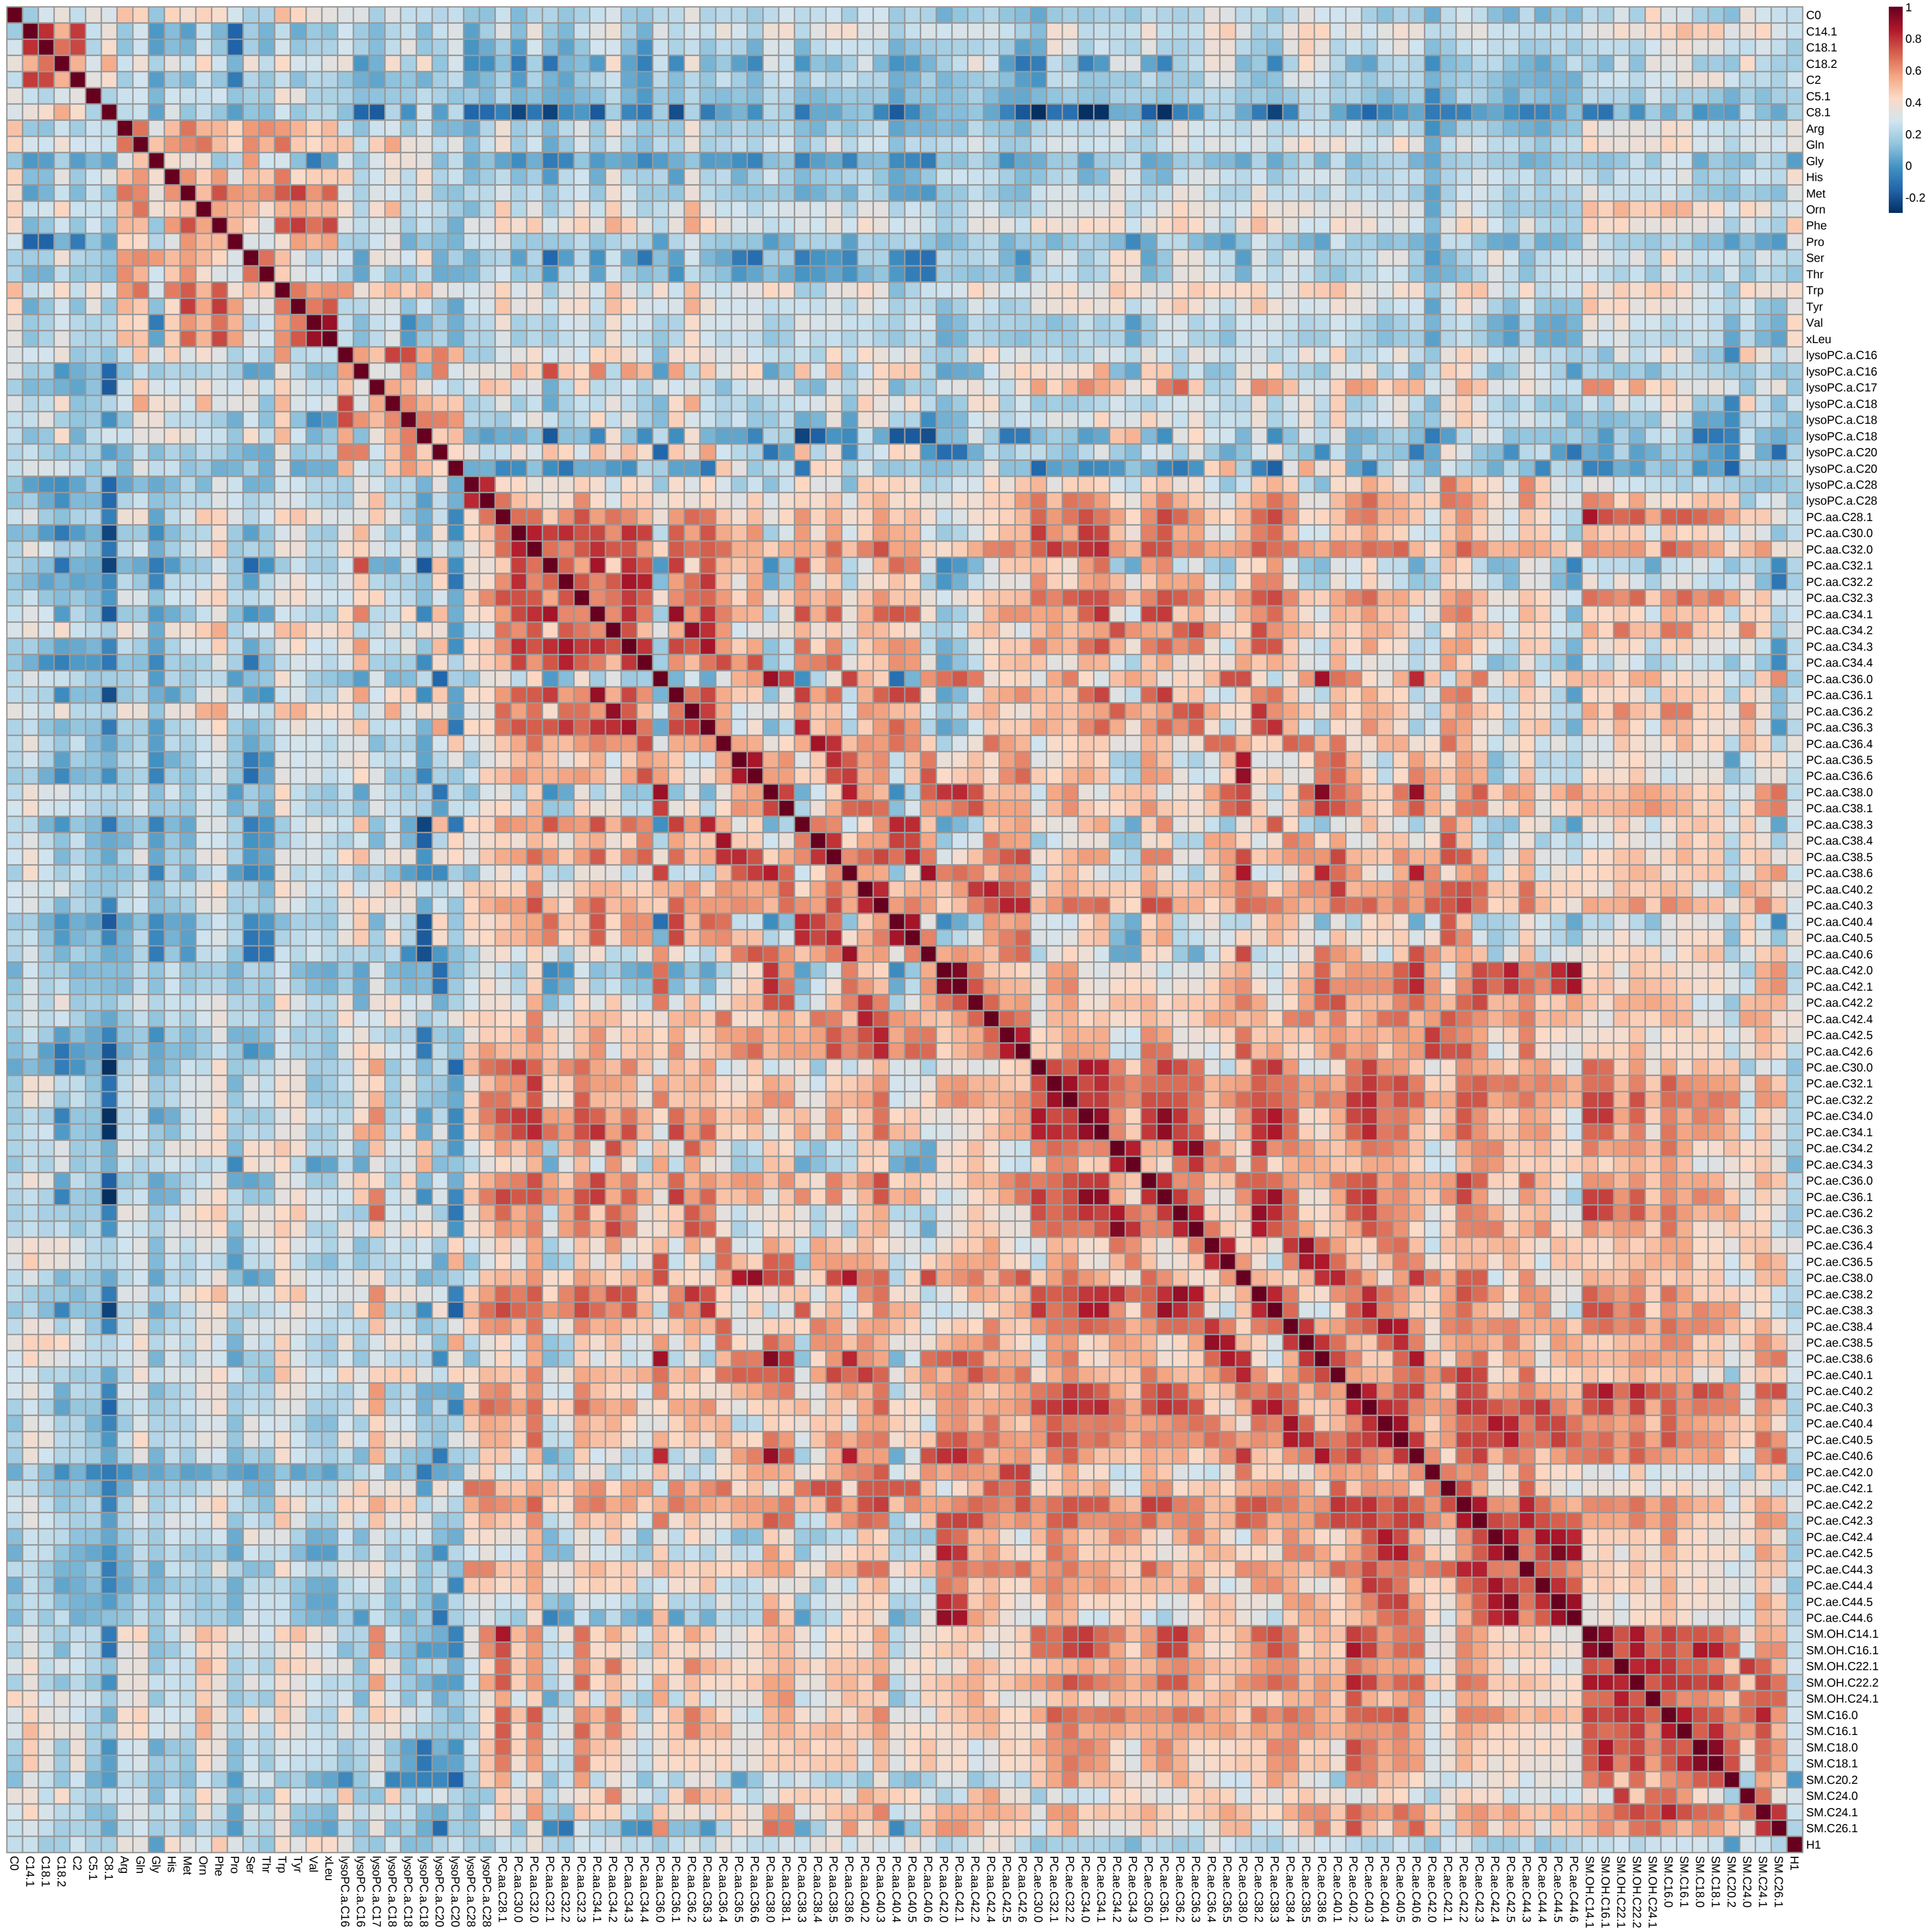

Supplement: MOESM2 [file 11306_2016_1084_MOESM2_ESM.pdf › 11306_2016_1084_MOESM2_ESM.pdf]
